# Supplementary material
Source: PubMed Central journal article supplement (PMC4289679)
Supplement: mmc1.pdf [file mmc1.pdf]

The American Journal of Human Genetics

Supplemental Data

## **HLA-DPB1 and HLA Class I Confer**

### **Risk of and Protection from Narcolepsy**

**Hanna M. Ollila, Jean-Marie Ravel, Fang Han, Juliette Faraco, Ling Lin, Xiuwen Zheng, Giuseppe Plazzi, Yves Dauvilliers, Fabio Pizza, Seung-Chul Hong, Poul Jennum, Stine Knudsen, Birgitte R. Kornum, Xiao Song Dong, Han Yan, Heeseung Hong, Cristin Coquillard, Joshua Mahlios, Otto Jolanki, Mali Einen, Sophie Lavault, Birgit Högl, Birgit Frauscher, Catherine Crowe, Markku Partinen, Yu Shu Huang, Patrice Bourgin, Outi Vaarala, Alex Désautels, Jacques Montplaisir, Steven J. Mack, Michael Mindrinos, Marcelo Fernandez-Vina, and Emmanuel Mignot**

Figure S1. Principal components in the matched data sets

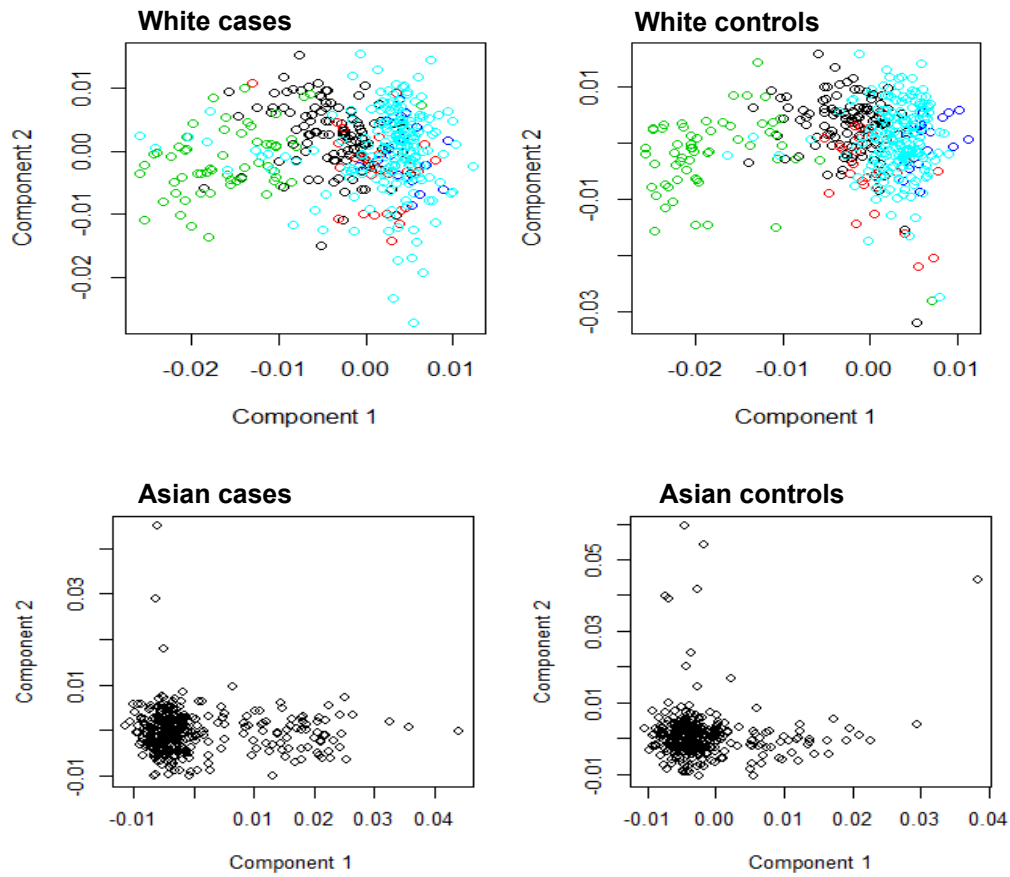

Principal components in the matched data sets. The components are shown separately for White (upper) and in Asian (lower) panels.

Table S1. Association of HLA-DRB1 alleles with narcolepsy in individuals matched for HLA-DQA1 and HLA-DQB1 alleles.

| HLA-DRB1 Allele | Imputed White (N=840)          |                             |                   |       | Imputed Asian (N=776)          |                             |                  |       | N controls (carrier frequency) |
|-----------------|--------------------------------|-----------------------------|-------------------|-------|--------------------------------|-----------------------------|------------------|-------|--------------------------------|
|                 | N controls (carrier frequency) | N cases (carrier frequency) | OR (CI)           | P     | N controls (carrier frequency) | N cases (carrier frequency) | OR (CI)          | P     |                                |
| 01:01           | 37 (8.69%)                     | 35 (8.45%)                  | 0.97 (0.6-1.57)   | 0.905 | 6 (1.55%)                      | 3 (0.77%)                   | 0.5 (0.12-2)     | 0.314 | 3 (2.03%)                      |
| 01:02           | 7 (1.64%)                      | 10 (2.42%)                  | 1.48 (0.56-3.93)  | 0.427 | 0 (0)                          | 2 (0.52%)                   | -                | 0.157 | -                              |
| 01:03           | 3 (0.70%)                      | 0 (0)                       | -                 | 0.087 | -                              | -                           | -                | -     | 1 (0.68%)                      |
| 03:01           | 47 (11.03%)                    | 46 (11.11%)                 | 1.01 (0.66-1.55)  | 0.971 | 17 (4.38%)                     | 18 (4.64%)                  | 1.06 (0.54-2.09) | 0.863 | 14 (9.46%)                     |
| 04:01           | 31 (7.28%)                     | 26 (6.28%)                  | 0.85 (0.5-1.46)   | 0.566 | 4 (1.03%)                      | 4 (1.03%)                   | 1 (0.25-4.03)    | 1     | 5 (3.38%)                      |
| 04:02           | 7 (1.64%)                      | 6 (1.45%)                   | 0.88 (0.29-2.64)  | 0.82  | 2 (0.52%)                      | 0 (0)                       | -                | 0.157 | 0 (0)                          |
| 04:03           | 0 (0)                          | 4 (0.97%)                   | -                 | 0.042 | 5 (1.29%)                      | 11 (2.84%)                  | 2.24 (0.77-6.49) | 0.13  | 3 (2.03%)                      |
| 04:04           | 13 (3.05%)                     | 11 (2.66%)                  | 0.87 (0.38-1.96)  | 0.731 | -                              | -                           | -                | -     | 3 (2.03%)                      |
| 04:05           | 0 (0)                          | 1 (0.24%)                   | -                 | 0.31  | 14 (3.61%)                     | 15 (3.87%)                  | 1.07 (0.51-2.26) | 0.85  | 7 (4.73%)                      |
| 04:06           | -                              | -                           | -                 | -     | 9 (2.32%)                      | 6 (1.55%)                   | 0.66 (0.23-1.88) | 0.434 | 7 (4.73%)                      |
| 04:07           | 2 (0.47%)                      | 6 (1.45%)                   | 3.12 (0.63-15.54) | 0.144 | -                              | -                           | -                | -     | -                              |
| 04:08           | 0 (0)                          | 1 (0.24%)                   | -                 | 0.31  | -                              | -                           | -                | -     | -                              |
| 04:10           | -                              | -                           | -                 | -     | 1 (0.26%)                      | 1 (0.26%)                   | 1 (0.06-16.04)   | 1     | 0 (0)                          |
| 07:01           | 70 (16.43%)                    | 69 (16.67%)                 | 1.02 (0.71-1.46)  | 0.927 | 46 (11.86%)                    | 45 (11.60%)                 | 0.98 (0.63-1.51) | 0.911 | 12 (8.11%)                     |
| 08:01           | 17 (3.99%)                     | 14 (3.38%)                  | 0.84 (0.41-1.73)  | 0.64  | -                              | -                           | -                | -     | 1 (0.68%)                      |
| 08:02           | -                              | -                           | -                 | -     | 5 (1.29%)                      | 4 (1.03%)                   | 0.8 (0.21-2.99)  | 0.737 | 1 (0.68%)                      |
| 08:03           | -                              | -                           | -                 | -     | 21 (5.41%)                     | 18 (4.64%)                  | 0.85 (0.45-1.62) | 0.622 | 3 (2.03%)                      |
| 08:04           | 3 (0.70%)                      | 4 (0.97%)                   | 1.38 (0.31-6.18)  | 0.676 | -                              | -                           | -                | -     | -                              |
| 09:01           | 2 (0.47%)                      | 3 (0.72%)                   | 1.55 (0.26-9.31)  | 0.631 | 49 (12.63%)                    | 49 (12.63%)                 | 1 (0.65-1.53)    | 1     | 10 (6.76%)                     |
| 10:01           | 7 (1.64%)                      | 6 (1.45%)                   | 0.88 (0.29-2.64)  | 0.82  | 8 (2.06%)                      | 8 (2.06%)                   | 1 (0.37-2.69)    | 1     | 1 (0.68%)                      |
| 11:01           | 60 (14.08%)                    | 53 (12.80%)                 | 0.9 (0.6-1.33)    | 0.586 | 43 (11.08%)                    | 50 (12.89%)                 | 1.19 (0.77-1.83) | 0.439 | 8 (5.41%)                      |
| 11:02           | -                              | -                           | -                 | -     | -                              | -                           | -                | -     | -                              |
| 11:03           | 0 (0)                          | 2 (0.48%)                   | -                 | 0.151 | -                              | -                           | -                | -     | -                              |
| 11:04           | 14 (3.29%)                     | 13 (3.14%)                  | 0.95 (0.44-2.06)  | 0.904 | 4 (1.03%)                      | 1 (0.26%)                   | 0.25 (0.03-2.23) | 0.178 | 1 (0.68%)                      |
| 11:06           | -                              | -                           | -                 | -     | -                              | -                           | -                | -     | 1 (0.68%)                      |
| 12:01           | 6 (1.41%)                      | 6 (1.45%)                   | 1.03 (0.33-3.22)  | 0.96  | 15 (3.87%)                     | 15 (3.87%)                  | 1 (0.48-2.07)    | 1     | 13 (8.78%)                     |
| 12:02           | -                              | -                           | -                 | -     | 28 (7.22%)                     | 31 (7.99%)                  | 1.12 (0.66-1.9)  | 0.685 | 13 (8.78%)                     |
| 13:01           | 14 (3.29%)                     | 13 (3.14%)                  | 0.95 (0.44-2.06)  | 0.904 | 9 (2.32%)                      | 8 (2.06%)                   | 0.89 (0.34-2.32) | 0.806 | 1 (0.68%)                      |
| 13:02           | 18 (4.23%)                     | 17 (4.11%)                  | 0.97 (0.49-1.91)  | 0.931 | 15 (3.87%)                     | 14 (3.61%)                  | 0.93 (0.44-1.96) | 0.85  | 11 (7.43%)                     |
| 13:03           | 11 (2.58%)                     | 8 (1.93%)                   | 0.74 (0.3-1.87)   | 0.527 | -                              | -                           | -                | -     | -                              |
| 13:05           | -                              | -                           | -                 | -     | -                              | -                           | -                | -     | -                              |
| 13:10           | -                              | -                           | -                 | -     | -                              | -                           | -                | -     | -                              |
| 13:12           | -                              | -                           | -                 | -     | 0 (0)                          | 2 (0.52%)                   | -                | 0.157 | -                              |
| 14:01           | 13 (3.05%)                     | 13 (3.14%)                  | 1.03 (0.47-2.25)  | 0.941 | 9 (2.32%)                      | 8 (2.06%)                   | 0.89 (0.34-2.32) | 0.806 | 0 (0)                          |
| 14:03           | -                              | -                           | -                 | -     | 4 (1.03%)                      | 1 (0.26%)                   | 0.25 (0.03-2.23) | 0.178 | 1 (0.68%)                      |
| 14:04           | -                              | -                           | -                 | -     | 5 (1.29%)                      | 4 (1.03%)                   | 0.8 (0.21-2.99)  | 0.737 | 1 (0.68%)                      |
| 14:05           | -                              | -                           | -                 | -     | 4 (1.03%)                      | 7 (1.80%)                   | 1.76 (0.51-6.07) | 0.362 | 5 (3.38%)                      |
| 14:07           | -                              | -                           | -                 | -     | -                              | -                           | -                | -     | 1 (0.68%)                      |
| 14:54           | -                              | -                           | -                 | -     | 2 (0.52%)                      | 1 (0.26%)                   | 0.5 (0.05-5.52)  | 0.563 | 5 (3.38%)                      |
| 15:01           | 423 (99.30%)                   | 413 (99.76%)                | 2.93 (0.3-28.27)  | 0.33  | 387 (99.74%)                   | 388 (100.00%)               | -                | 0.317 | 146 (98.65%)                   |
| 15:02           | 2 (0.47%)                      | 2 (0.48%)                   | 1.03 (0.14-7.34)  | 0.977 | 19 (4.90%)                     | 23 (5.93%)                  | 1.22 (0.66-2.29) | 0.526 | 8 (5.41%)                      |
| 15:03           | -                              | -                           | -                 | -     | -                              | -                           | -                | -     | 0 (0)                          |
| 16:01           | 12 (2.82%)                     | 12 (2.90%)                  | 1.03 (0.46-2.32)  | 0.943 | -                              | -                           | -                | -     | 0 (0)                          |
| 16:02           | 1 (0.23%)                      | 0 (0)                       | -                 | 0.324 | 14 (3.61%)                     | 11 (2.84%)                  | 0.78 (0.35-1.74) | 0.542 | 1 (0.68%)                      |

Association of HLA-DRB1 alleles with narcolepsy in individuals matched for HLA-DQA1 and HLA-DQB1 alleles. P values calculated with  $\chi^2$  test and Maentel Haenszel test. CI = confidence interval. Upper and lower limits r

Table S1. continued

| Typed Asian (N=296)            |                   |       | Typed White (N=530)               |                                |                   |       | Mantel Haenszel test |                    |       |                 |
|--------------------------------|-------------------|-------|-----------------------------------|--------------------------------|-------------------|-------|----------------------|--------------------|-------|-----------------|
| N cases<br>(carrier frequency) | OR (CI)           | P     | N controls<br>(carrier frequency) | N cases<br>(carrier frequency) | OR (CI)           | P     | Allele               | OR (CI)            | P     | Heterogeneity P |
| 3 (2.03%)                      | 1 (0.2-5.04)      | 1     | 13 (4.91%)                        | 9 (3.40%)                      | 0.68 (0.29-1.62)  | 0.384 | 01:01                | 0.85 (0.58-1.26)   | 0.43  | 0.765           |
| -                              | -                 | -     | 0 (0)                             | 4 (1.51%)                      | -                 | 0.045 | 01:02                | 2.37 (0.97-5.82)   | 0.052 | 0               |
| 1 (0.68%)                      | 1 (0.06-16.14)    | 1     | 3 (1.13%)                         | 3 (1.13%)                      | 1 (0.2-5)         | 1     | 01:03                | 0.57 (0.17-1.97)   | 0.371 | 0.433           |
| 14 (9.46%)                     | 1 (0.46-2.18)     | 1     | 51 (19.25%)                       | 50 (18.87%)                    | 0.98 (0.63-1.51)  | 0.912 | 03:01                | 1.00 (0.77-1.30)   | 0.982 | 0.998           |
| 8 (5.41%)                      | 1.63 (0.52-5.12)  | 0.395 | 28 (10.57%)                       | 27 (10.19%)                    | 0.96 (0.55-1.68)  | 0.887 | 04:01                | 0.97 (0.68-1.37)   | 0.844 | 0.797           |
| 2 (1.35%)                      | -                 | 0.156 | 0 (0)                             | 3 (1.13%)                      | -                 | 0.082 | 04:02                | 1.25 (0.51-3.03)   | 0.623 | 0               |
| 3 (2.03%)                      | 1 (0.2-5.04)      | 1     | 2 (0.75%)                         | 4 (1.51%)                      | 2.02 (0.37-11.1)  | 0.412 | 04:03                | 2.23 (1.05-4.74)   | 0.032 | 0.618           |
| 2 (1.35%)                      | 0.66 (0.11-4.02)  | 0.652 | 18 (6.79%)                        | 12 (4.53%)                     | 0.65 (0.31-1.38)  | 0.259 | 04:04                | 0.73 (0.43-1.24)   | 0.25  | 0.873           |
| 6 (4.05%)                      | 0.85 (0.28-2.6)   | 0.777 | -                                 | -                              | -                 | -     | 04:05                | 1.05 (0.57-1.93)   | 0.875 | 0.708           |
| 5 (3.38%)                      | 0.7 (0.22-2.27)   | 0.556 | -                                 | -                              | -                 | -     | 04:06                | 0.68 (0.31-1.48)   | 0.329 | 0.937           |
| -                              | -                 | -     | 4 (1.51%)                         | 7 (2.64%)                      | 1.77 (0.51-6.12)  | 0.361 | 04:07                | 2.22 (0.84-5.88)   | 0.1   | 0.584           |
| -                              | -                 | -     | 3 (1.13%)                         | 1 (0.38%)                      | 0.33 (0.03-3.2)   | 0.315 | 04:08                | 0.67 (0.11-4.01)   | 0.659 | 0               |
| 1 (0.68%)                      | -                 | 0.316 | -                                 | -                              | -                 | -     | 04:10                | 2.00 ( 0.18-22.13) | 0.564 | 0               |
| 12 (8.11%)                     | 1 (0.43-2.3)      | 1     | 34 (12.83%)                       | 35 (13.21%)                    | 1.03 (0.62-1.71)  | 0.897 | 07:01                | 1.01 (0.80-1.27)   | 0.953 | 0.998           |
| 0 (0)                          | -                 | 0.316 | 8 (3.02%)                         | 7 (2.64%)                      | 0.87 (0.31-2.44)  | 0.793 | 08:01                | 0.82 (0.46-1.47)   | 0.499 | 0.884           |
| 2 (1.35%)                      | 2.01 (0.18-22.45) | 0.562 | 0 (0)                             | 1 (0.38%)                      | -                 | 0.317 | 08:02                | 1.17 (0.39-3.50)   | 0.781 | 0.473           |
| 4 (2.70%)                      | 1.34 (0.3-6.11)   | 0.702 | 1 (0.38%)                         | 0 (0)                          | -                 | 0.317 | 08:03                | 0.87 (0.49-1.57)   | 0.655 | 0.575           |
| -                              | -                 | -     | -                                 | -                              | -                 | -     | 08:04                | 1.38 (0.31-6.18)   | 0.676 | 0               |
| 9 (6.08%)                      | 0.89 (0.35-2.27)  | 0.813 | 2 (0.75%)                         | 2 (0.75%)                      | 1 (0.14-7.15)     | 1     | 09:01                | 1.00 (0.69-1.45)   | 0.995 | 0.963           |
| 1 (0.68%)                      | 1 (0.06-16.14)    | 1     | 2 (0.75%)                         | 2 (0.75%)                      | 1 (0.14-7.15)     | 1     | 10:01                | 0.95 (0.49-1.86)   | 0.89  | 0.998           |
| 11 (7.43%)                     | 1.41 (0.55-3.6)   | 0.477 | 28 (10.57%)                       | 20 (7.55%)                     | 0.69 (0.38-1.26)  | 0.226 | 11:01                | 0.97 (0.76-1.25)   | 0.828 | 0.423           |
| -                              | -                 | -     | 0 (0)                             | 1 (0.38%)                      | -                 | 0.317 | 11:02                | -                  | 0.317 | -               |
| -                              | -                 | -     | 2 (0.75%)                         | 2 (0.75%)                      | 1 (0.14-7.15)     | 1     | 11:03                | 2.02 ( 0.37-11.06) | 0.407 | 0               |
| 1 (0.68%)                      | 1 (0.06-16.14)    | 1     | 9 (3.40%)                         | 9 (3.40%)                      | 1 (0.39-2.56)     | 1     | 11:04                | 0.87 (0.50-1.51)   | 0.611 | 0.704           |
| 1 (0.68%)                      | 1 (0.06-16.14)    | 1     | -                                 | -                              | -                 | -     | 11:06                | 1.00 ( 0.06-16.14) | 1     | 1               |
| 13 (8.78%)                     | 1 (0.45-2.24)     | 1     | 8 (3.02%)                         | 11 (4.15%)                     | 1.39 (0.55-3.52)  | 0.483 | 12:01                | 1.08 (0.70-1.66)   | 0.728 | 0.946           |
| 12 (8.11%)                     | 0.92 (0.4-2.08)   | 0.834 | 0 (0)                             | 1 (0.38%)                      | -                 | 0.317 | 12:02                | 1.08 (0.69-1.68)   | 0.735 | 0.681           |
| 1 (0.68%)                      | 1 (0.06-16.14)    | 1     | 5 (1.89%)                         | 4 (1.51%)                      | 0.8 (0.21-3)      | 0.737 | 13:01                | 0.91 (0.53-1.55)   | 0.721 | 0.996           |
| 11 (7.43%)                     | 1 (0.42-2.38)     | 1     | 11 (4.15%)                        | 11 (4.15%)                     | 1 (0.43-2.35)     | 1     | 13:02                | 0.97 (0.66-1.43)   | 0.883 | 0.999           |
| -                              | -                 | -     | 2 (0.75%)                         | 5 (1.89%)                      | 2.53 (0.49-13.15) | 0.254 | 13:03                | 1.02 (0.47-2.22)   | 0.957 | 0.203           |
| -                              | -                 | -     | 2 (0.75%)                         | 3 (1.13%)                      | 1.51 (0.25-9.09)  | 0.653 | 13:05                | 1.51 (0.25-9.09)   | 0.653 | 1               |
| -                              | -                 | -     | 0 (0)                             | 1 (0.38%)                      | -                 | 0.317 | 13:10                | -                  | 0.317 | -               |
| -                              | -                 | -     | -                                 | -                              | -                 | -     | 13:12                | -                  | 0.157 | -               |
| 1 (0.68%)                      | -                 | 0.316 | 0 (0)                             | 1 (0.38%)                      | -                 | 0.317 | 14:01                | 1.06 (0.59-1.93)   | 0.836 | 0.703           |
| 1 (0.68%)                      | 1 (0.06-16.14)    | 1     | -                                 | -                              | -                 | -     | 14:03                | 0.40 (0.08-2.06)   | 0.256 | 0.439           |
| 1 (0.68%)                      | 1 (0.06-16.14)    | 1     | -                                 | -                              | -                 | -     | 14:04                | 0.83 (0.25-2.74)   | 0.762 | 0.886           |
| 5 (3.38%)                      | 1 (0.28-3.53)     | 1     | -                                 | -                              | -                 | -     | 14:05                | 1.34 (0.56-3.22)   | 0.508 | 0.529           |
| 0 (0)                          | -                 | 0.316 | -                                 | -                              | -                 | -     | 14:07                | -                  | 0.317 | -               |
| 5 (3.38%)                      | 1 (0.28-3.53)     | 1     | 8 (3.02%)                         | 7 (2.64%)                      | 0.87 (0.31-2.44)  | 0.793 | 14:54                | 0.86 (0.41-1.83)   | 0.702 | 0.881           |
| 145 (97.97%)                   | 0.66 (0.11-4.02)  | 0.652 | 262 (98.87%)                      | 265 (100.00%)                  | -                 | 0.082 | 15:01                | 2.25 (0.69-7.34)   | 0.169 | 0.178           |
| 3 (2.03%)                      | 0.36 (0.09-1.39)  | 0.124 | 1 (0.38%)                         | 1 (0.38%)                      | 1 (0.06-16.07)    | 1     | 15:02                | 0.97 (0.57-1.63)   | 0.9   | 0.459           |
| 1 (0.68%)                      | -                 | 0.316 | 1 (0.38%)                         | 0 (0)                          | -                 | 0.317 | 15:03                | 1.00 ( 0.06-15.99) | 1     | -               |
| 1 (0.68%)                      | -                 | 0.316 | 3 (1.13%)                         | 2 (0.75%)                      | 0.66 (0.11-4.01)  | 0.653 | 16:01                | 1.02 (0.50-2.11)   | 0.949 | 0.637           |
| 3 (2.03%)                      | 3.04 (0.31-29.58) | 0.314 | 1 (0.38%)                         | 1 (0.38%)                      | 1 (0.06-16.07)    | 1     | 16:02                | 0.88 (0.44-1.78)   | 0.722 | 0.539           |

represent 95 intervals. Cases and controls are matched for country, ethnicity and HLA-DRB1 and HLA-DQ genotypes.

Table S2. Association of HLA-DPB1 alleles with narcolepsy in individuals matched for HLA-DRB1, HLA-DQB1 and HLA-DQA1 alleles.

| HLA-DPB1 allele | Asian typed (N=160)       |                        |                      |       | White typed (N=426)       |                        |                      |       | N controls (carrier freq) |
|-----------------|---------------------------|------------------------|----------------------|-------|---------------------------|------------------------|----------------------|-------|---------------------------|
|                 | N controls (carrier freq) | N cases (carrier freq) | OR (CI)              | P     | N controls (carrier freq) | N cases (carrier freq) | OR (CI)              | P     |                           |
| 01:01           | -                         | -                      | -                    | -     | 19 (8.920%)               | 17 (7.981%)            | 0.886 (0.447-1.755)  | 0.728 | 14 (3.518%)               |
| 02:01           | 53 (66.250%)              | 52 (65.000%)           | 0.946 (0.493-1.817)  | 0.868 | 35 (16.432%)              | 37 (17.371%)           | 1.069 (0.644-1.775)  | 0.796 | 76 (19.095%)              |
| 02:02           | 8 (10.000%)               | 5 (6.250%)             | 0.600 (0.187-1.920)  | 0.385 | 1 (0.469%)                | 2 (0.939%)             | 2.009 (0.181-22.329) | 0.562 | 5 (1.256%)                |
| 03:01           | 7 (8.750%)                | 5 (6.250%)             | 0.695 (0.211-2.290)  | 0.548 | 32 (15.023%)              | 33 (15.493%)           | 1.037 (0.611-1.759)  | 0.893 | 64 (16.080%)              |
| 04:01           | 18 (22.500%)              | 8 (10.000%)            | 0.383 (0.156-0.941)  | 0.032 | 175 (82.160%)             | 173 (81.221%)          | 0.939 (0.575-1.535)  | 0.802 | 332 (83.417%)             |
| 04:02           | 7 (8.750%)                | 4 (5.000%)             | 0.549 (0.154-1.954)  | 0.349 | 38 (17.840%)              | 23 (10.798%)           | 0.557 (0.319-0.973)  | 0.038 | 76 (19.095%)              |
| 05:01           | 35 (43.750%)              | 50 (62.500%)           | 2.143 (1.138-4.033)  | 0.017 | 12 (5.634%)               | 9 (4.225%)             | 0.739 (0.305-1.792)  | 0.502 | 22 (5.528%)               |
| 06:01           | -                         | -                      | -                    | -     | 6 (2.817%)                | 10 (4.695%)            | 1.700 (0.606-4.763)  | 0.308 | -                         |
| 06:02           | -                         | -                      | -                    | -     | -                         | -                      | -                    | -     | 1 (0.251%)                |
| 09:01           | 2 (2.500%)                | 1 (1.250%)             | 0.494 (0.044-5.556)  | 0.56  | 0 (0)                     | 2 (0.939%)             | -                    | 0.156 | 6 (1.508%)                |
| 09:02           | -                         | -                      | -                    | -     | -                         | -                      | -                    | -     | -                         |
| 10:01           | -                         | -                      | -                    | -     | 11 (5.164%)               | 2 (0.939%)             | 0.174 (0.038-0.795)  | 0.011 | 18 (4.523%)               |
| 104:01          | -                         | -                      | -                    | -     | -                         | -                      | -                    | -     | 6 (1.508%)                |
| 105:01          | -                         | -                      | -                    | -     | 2 (0.939%)                | 0 (0)                  | -                    | 0.156 | -                         |
| 11:01           | -                         | -                      | -                    | -     | 5 (2.347%)                | 4 (1.878%)             | 0.796 (0.211-3.007)  | 0.736 | 11 (2.764%)               |
| 13:01           | 8 (10.000%)               | 5 (6.250%)             | 0.600 (0.187-1.920)  | 0.385 | 3 (1.408%)                | 4 (1.878%)             | 1.340 (0.296-6.059)  | 0.703 | 14 (3.518%)               |
| 14:01           | 0 (0)                     | 6 (7.500%)             | -                    | 0.013 | 5 (2.347%)                | 3 (1.408%)             | 0.594 (0.140-2.519)  | 0.475 | 13 (3.266%)               |
| 15:01           | -                         | -                      | -                    | -     | 0 (0)                     | 4 (1.878%)             | -                    | 0.044 | 3 (0.754%)                |
| 16:01           | -                         | -                      | -                    | -     | 1 (0.469%)                | 2 (0.939%)             | 2.009 (0.181-22.329) | 0.562 | 1 (0.251%)                |
| 17:01           | 1 (1.250%)                | 2 (2.500%)             | 2.026 (0.180-22.797) | 0.56  | 6 (2.817%)                | 5 (2.347%)             | 0.829 (0.249-2.760)  | 0.76  | 7 (1.759%)                |
| 19:01           | 0 (0)                     | 1 (1.250%)             | -                    | 0.316 | -                         | -                      | -                    | -     | 6 (1.508%)                |
| 20:01           | -                         | -                      | -                    | -     | 3 (1.408%)                | 2 (0.939%)             | 0.664 (0.110-4.011)  | 0.653 | -                         |
| 21:01           | 0 (0)                     | 1 (1.250%)             | -                    | 0.316 | -                         | -                      | -                    | -     | -                         |
| 23:01           | -                         | -                      | -                    | -     | 3 (1.408%)                | 9 (4.225%)             | 3.088 (0.824-11.569) | 0.079 | -                         |
| 26:01           | 1 (1.250%)                | 0 (0)                  | -                    | 0.316 | 0 (0)                     | 1 (0.469%)             | -                    | 0.317 | -                         |
| 34:01           | -                         | -                      | -                    | -     | 1 (0.469%)                | 0 (0)                  | -                    | 0.317 | -                         |
| 41:01           | -                         | -                      | -                    | -     | 0 (0)                     | 1 (0.469%)             | -                    | 0.317 | -                         |

Association of HLA-DPB1 alleles with narcolepsy in individuals matched for HLA-DRB1, HLA-DQB1 and HLA-DQA1 alleles. P values calculated with  $\chi^2$  test and Maentel Haenszel test.

Table S2. continued

| White imputed (N=796)  |                         |       | Asian imputed (N=744)     |                        |                        |           | Meta-analysis |                         |           |                         |
|------------------------|-------------------------|-------|---------------------------|------------------------|------------------------|-----------|---------------|-------------------------|-----------|-------------------------|
| N cases (carrier freq) | OR (CI)                 | P     | N controls (carrier freq) | N cases (carrier freq) | OR (CI)                | P         | Allele        | OR (CI)                 | P         | P test of heterogeneity |
| 27 (6.784%)            | 1.996<br>(1.031-3.866)  | 0.037 | -                         | -                      | -                      | -         | 01:01         | 1.360<br>(0.853-2.169)  | 0.195     | 0.094                   |
| 92 (23.116%)           | 1.274<br>(0.905-1.793)  | 0.165 | 191 (51.344%)             | 192 (51.613%)          | 1.011<br>(0.758-1.348) | 0.942     | 02:01         | 1.091<br>(0.900-1.322)  | 0.377     | 0.741                   |
| 5 (1.256%)             | 1.000<br>(0.287-3.481)  | 1     | 23 (6.183%)               | 27 (7.258%)            | 1.188<br>(0.668-2.112) | 0.558     | 02:02         | 1.058<br>(0.665-1.681)  | 0.813     | 0.718                   |
| 66 (16.583%)           | 1.037<br>(0.712-1.511)  | 0.848 | 40 (10.753%)              | 29 (7.796%)            | 0.702<br>(0.425-1.158) | 0.164     | 03:01         | 0.919<br>(0.713-1.186)  | 0.517     | 0.589                   |
| 335 (84.171%)          | 1.057<br>(0.725-1.541)  | 0.773 | 96 (25.806%)              | 62 (16.667%)           | 0.575<br>(0.402-0.823) | 0.002     | 04:01         | 0.763<br>(0.612-0.951)  | 0.016     | 0.042                   |
| 43 (10.804%)           | 0.513<br>(0.343-0.768)  | 0.001 | 42 (11.290%)              | 19 (5.108%)            | 0.423<br>(0.241-0.742) | 0.002     | 04:02         | 0.501<br>(0.380-0.659)  | 6.105e-07 | 0.914                   |
| 21 (5.276%)            | 0.952<br>(0.515-1.760)  | 0.875 | 201 (54.032%)             | 245 (65.860%)          | 1.641<br>(1.221-2.206) | 9.947e-04 | 05:01         | 1.482<br>(1.172-1.875)  | 0.001     | 0.106                   |
| -                      | -                       | -     | -                         | -                      | -                      | -         | 06:01         | 1.700<br>(0.606-4.763)  | 0.309     | 1                       |
| 1 (0.251%)             | 1.000<br>(0.062-16.043) | 1     | -                         | -                      | -                      | -         | 06:02         | 1.000<br>(0.062-16.043) | 1         | 1                       |
| 4 (1.005%)             | 0.663<br>(0.186-2.369)  | 0.524 | 6 (1.613%)                | 9 (2.419%)             | 1.512<br>(0.533-4.292) | 0.434     | 09:01         | 1.145<br>(0.556-2.360)  | 0.713     | 0.486                   |
| -                      | -                       | -     | 7 (1.882%)                | 10 (2.688%)            | 1.440<br>(0.542-3.825) | 0.462     | 09:02         | 1.440<br>(0.542-3.825)  | 0.462     | 0                       |
| 7 (1.759%)             | 0.378<br>(0.156-0.915)  | 0.025 | -                         | -                      | -                      | -         | 10:01         | 0.300<br>(0.141-0.640)  | 0.001     | 0.385                   |
| 10 (2.513%)            | 1.684<br>(0.606-4.678)  | 0.312 | 3 (0.806%)                | 2 (0.538%)             | 0.665<br>(0.110-4.002) | 0.654     | 104:01        | 1.340<br>(0.561-3.201)  | 0.509     | 0.378                   |
| -                      | -                       | -     | -                         | -                      | -                      | -         | 105:01        | -                       | 0.157     | -                       |
| 8 (2.010%)             | 0.722<br>(0.287-1.814)  | 0.486 | -                         | -                      | -                      | -         | 11:01         | 0.745<br>(0.349-1.588)  | 0.445     | 0.905                   |
| 10 (2.513%)            | 0.707<br>(0.310-1.611)  | 0.407 | 13 (3.495%)               | 16 (4.301%)            | 1.241<br>(0.588-2.618) | 0.57      | 13:01         | 0.918<br>(0.574-1.467)  | 0.72      | 0.622                   |
| 9 (2.261%)             | 0.685<br>(0.290-1.622)  | 0.387 | 23 (6.183%)               | 19 (5.108%)            | 0.817<br>(0.437-1.526) | 0.525     | 14:01         | 0.899<br>(0.571-1.414)  | 0.644     | 0.675                   |
| 5 (1.256%)             | 1.675<br>(0.398-7.057)  | 0.477 | -                         | -                      | -                      | -         | 15:01         | 3.025<br>(0.816-11.223) | 0.082     | 0                       |
| 2 (0.503%)             | 2.005<br>(0.181-22.201) | 0.563 | -                         | -                      | -                      | -         | 16:01         | 2.007<br>(0.366-11.004) | 0.413     | 0.999                   |
| 10 (2.513%)            | 1.440<br>(0.542-3.821)  | 0.462 | 25 (6.720%)               | 20 (5.376%)            | 0.789<br>(0.430-1.446) | 0.442     | 17:01         | 0.946<br>(0.597-1.499)  | 0.815     | 0.686                   |
| 5 (1.256%)             | 0.831<br>(0.252-2.746)  | 0.761 | 4 (1.075%)                | 4 (1.075%)             | 1.000<br>(0.248-4.029) | 1         | 19:01         | 1.000<br>(0.414-2.415)  | 1         | 0.762                   |
| -                      | -                       | -     | -                         | -                      | -                      | -         | 20:01         | 0.664<br>(0.110-4.011)  | 0.653     | 1                       |
| -                      | -                       | -     | -                         | -                      | -                      | -         | 21:01         | -                       | 0.317     | -                       |
| -                      | -                       | -     | -                         | -                      | -                      | -         | 23:01         | 3.088<br>(0.824-11.569) | 0.079     | 1                       |
| -                      | -                       | -     | 2 (0.538%)                | 1 (0.269%)             | 0.499<br>(0.045-5.523) | 0.563     | 26:01         | 0.666<br>(0.111-3.993)  | 0.654     | 0                       |
| -                      | -                       | -     | -                         | -                      | -                      | -         | 34:01         | -                       | 0.317     | -                       |
| -                      | -                       | -     | -                         | -                      | -                      | -         | 41:01         | -                       | 0.317     | -                       |

CI = confidence interval. Upper and lower limits represent 95 intervals. Cases and controls are matched for country, ethnicity and HLA-DRB1 and HLA-DQ genotypes.

Table S3. Association of HLA-DPA1 alleles with narcolepsy in individuals matched for HLA-DRB1, HLA-DQB1 and HLA-DQA1 alleles.

| HLA-DPA1 allele | Asian typed (N=160)            |                             |                        |       | White typed (N=426)            |                             |                        |       | Wh            |
|-----------------|--------------------------------|-----------------------------|------------------------|-------|--------------------------------|-----------------------------|------------------------|-------|---------------|
|                 | N controls (carrier frequency) | N cases (carrier frequency) | OR (CI)                | P     | N controls (carrier frequency) | N cases (carrier frequency) | OR (CI lower - upper)  | P     |               |
| <b>01:03</b>    | 57 (71.250%)                   | 49 (61.250%)                | 0.638<br>(0.329-1.235) | 0.181 | 208 (97.653%)                  | 209 (98.122%)               | 1.256<br>(0.333-4.743) | 0.736 | 393 (98.744%) |
| <b>01:04</b>    | -                              | -                           | -                      | -     | 0 (0)                          | 3 (1.408%)                  | -                      | 0.082 | 2 (0.503%)    |
| <b>02:01</b>    | 10 (12.500%)                   | 9 (11.250%)                 | 0.887<br>(0.340-2.315) | 0.807 | 47 (22.066%)                   | 40 (18.779%)                | 0.817<br>(0.509-1.310) | 0.4   | 81 (20.352%)  |
| <b>02:02</b>    | 61 (76.250%)                   | 67 (83.750%)                | 1.605<br>(0.731-3.523) | 0.236 | 14 (6.573%)                    | 9 (4.225%)                  | 0.627<br>(0.265-1.482) | 0.284 | 25 (6.281%)   |
| <b>03:01</b>    | -                              | -                           | -                      | -     | 2 (0.939%)                     | 0 (0)                       | -                      | 0.156 | -             |
| <b>04:01</b>    | -                              | -                           | -                      | -     | -                              | -                           | -                      | -     | -             |

Association of HLA-DPA1 alleles with narcolepsy in individuals matched for HLA-DRB1, HLA-DQB1 and HLA-DQA1 alleles. P values calculated with  $\chi^2$  test and Maentel Haenszel test.

Table S3. continued

| ite imputed (N=796)         |                        |       | Asian imputed (N=744)          |                             |                        |       | Meta-analysis |                         |       |                         |
|-----------------------------|------------------------|-------|--------------------------------|-----------------------------|------------------------|-------|---------------|-------------------------|-------|-------------------------|
| N cases (carrier frequency) | OR (CI)                | P     | N controls (carrier frequency) | N cases (carrier frequency) | OR (CI)                | P     | Allele        | OR (CI)                 | P     | P test of heterogeneity |
| 392 (98.492%)               | 0.831<br>(0.252-2.746) | 0.761 | 238 (63.978%)                  | 196 (52.688%)               | 0.627<br>(0.467-0.841) | 0.002 | 01:03         | 0.654<br>(0.506-0.845)  | 0.001 | 0.761                   |
| 3 (0.754%)                  | 1.504<br>(0.250-9.049) | 0.654 | -                              | -                           | -                      | -     | 01:04         | 3.015<br>(0.607-14.982) | 0.156 | 0                       |
| 69 (17.337%)                | 0.821<br>(0.575-1.172) | 0.277 | 49 (13.172%)                   | 43 (11.559%)                | 0.862<br>(0.556-1.334) | 0.504 | 02:01         | 0.835<br>(0.662-1.052)  | 0.126 | 0.997                   |
| 29 (7.286%)                 | 1.173<br>(0.674-2.040) | 0.573 | 309 (83.065%)                  | 328 (88.172%)               | 1.520<br>(1.003-2.302) | 0.047 | 02:02         | 1.289<br>(0.968-1.716)  | 0.081 | 0.294                   |
| -                           | -                      | -     | -                              | -                           | -                      | -     | 03:01         | -                       | 0.157 | -                       |
| -                           | -                      | -     | 0 (0)                          | 1 (0.269%)                  | -                      | 0.317 | 04:01         | -                       | 0.317 | -                       |

CI = confidence interval. Upper and lower limits represent 95 intervals. Cases and controls are matched for country, ethnicity and HLA-DRB1 and HLA-DQ genotypes.



Table S5. Association of HLA-A alleles with narcolepsy in individuals matched for HLA-DRB1, HLA-DQB1 and HLA-DQA1 alleles.

| HLA-A Allele | Asian typed (N=154)            |                             |                         |       | White typed (N=418)            |                             |                         |       | N controls (carrier frequency) |
|--------------|--------------------------------|-----------------------------|-------------------------|-------|--------------------------------|-----------------------------|-------------------------|-------|--------------------------------|
|              | N controls (carrier frequency) | N cases (carrier frequency) | OR (CI lower - upper)   | P     | N controls (carrier frequency) | N cases (carrier frequency) | OR (CI lower - upper)   | P     |                                |
| 01:01        | 1 (1.299%)                     | 2 (2.597%)                  | 2.027<br>(0.180-22.827) | 0.56  | 58 (27.751%)                   | 55 (26.316%)                | 0.930<br>(0.604-1.432)  | 0.741 | 86 (21.608%)                   |
| 01:02        | -                              | -                           | -                       | -     | 0 (0)                          | 1 (0.478%)                  | -                       | 0.317 | -                              |
| 02:01        | 23 (29.870%)                   | 26 (33.766%)                | 1.197<br>(0.607-2.361)  | 0.604 | 105 (50.239%)                  | 105 (50.239%)               | 1.000<br>(0.681-1.467)  | 1     | 183 (45.980%)                  |
| 02:02        | -                              | -                           | -                       | -     | -                              | -                           | -                       | -     | 0 (0)                          |
| 02:03        | -                              | -                           | -                       | -     | -                              | -                           | -                       | -     | -                              |
| 02:05        | -                              | -                           | -                       | -     | 3 (1.435%)                     | 5 (2.392%)                  | 1.683<br>(0.397-7.135)  | 0.475 | 7 (1.759%)                     |
| 02:06        | 16 (20.779%)                   | 15 (19.481%)                | 0.922<br>(0.419-2.029)  | 0.841 | 2 (0.957%)                     | 0 (0)                       | -                       | 0.156 | 1 (0.251%)                     |
| 02:07        | 2 (2.597%)                     | 2 (2.597%)                  | 1.000<br>(0.137-7.286)  | 1     | -                              | -                           | -                       | -     | -                              |
| 02:10        | 2 (2.597%)                     | 2 (2.597%)                  | 1.000<br>(0.137-7.286)  | 1     | -                              | -                           | -                       | -     | -                              |
| 02:17        | -                              | -                           | -                       | -     | 0 (0)                          | 1 (0.478%)                  | -                       | 0.317 | -                              |
| 03:01        | 4 (5.195%)                     | 0 (0)                       | -                       | 0.043 | 84 (40.191%)                   | 61 (29.187%)                | 0.613<br>(0.408-0.921)  | 0.018 | 141 (35.427%)                  |
| 03:02        | -                              | -                           | -                       | -     | 0 (0)                          | 1 (0.478%)                  | -                       | 0.317 | -                              |
| 11:01        | 22 (28.571%)                   | 32 (41.558%)                | 1.778<br>(0.909-3.477)  | 0.091 | 22 (10.526%)                   | 35 (16.746%)                | 1.710<br>(0.965-3.029)  | 0.064 | 47 (11.809%)                   |
| 11:02        | -                              | -                           | -                       | -     | -                              | -                           | -                       | -     | -                              |
| 23:01        | -                              | -                           | -                       | -     | 4 (1.914%)                     | 6 (2.871%)                  | 1.515<br>(0.421-5.448)  | 0.522 | 21 (5.276%)                    |
| 24:02        | 30 (38.961%)                   | 30 (38.961%)                | 1.000<br>(0.523-1.911)  | 1     | 31 (14.833%)                   | 30 (14.354%)                | 0.962<br>(0.559-1.657)  | 0.89  | 81 (20.352%)                   |
| 24:03        | -                              | -                           | -                       | -     | 0 (0)                          | 1 (0.478%)                  | -                       | 0.317 | -                              |
| 24:20        | 0 (0)                          | 1 (1.299%)                  | -                       | 0.316 | -                              | -                           | -                       | -     | -                              |
| 25:01        | -                              | -                           | -                       | -     | 13 (6.220%)                    | 17 (8.134%)                 | 1.335<br>(0.631-2.823)  | 0.448 | 22 (5.528%)                    |
| 26:01        | 5 (6.494%)                     | 3 (3.896%)                  | 0.584<br>(0.135-2.533)  | 0.468 | 4 (1.914%)                     | 13 (6.220%)                 | 3.399<br>(1.090-10.603) | 0.026 | 17 (4.271%)                    |
| 26:02        | 1 (1.299%)                     | 1 (1.299%)                  | 1.000<br>(0.061-16.281) | 1     | -                              | -                           | -                       | -     | -                              |
| 26:03        | 1 (1.299%)                     | 2 (2.597%)                  | 2.027<br>(0.180-22.827) | 0.56  | -                              | -                           | -                       | -     | -                              |
| 29:01        | -                              | -                           | -                       | -     | -                              | -                           | -                       | -     | 4 (1.005%)                     |
| 29:02        | -                              | -                           | -                       | -     | 13 (6.220%)                    | 10 (4.785%)                 | 0.758<br>(0.325-1.768)  | 0.52  | 31 (7.789%)                    |
| 30:01        | 4 (5.195%)                     | 2 (2.597%)                  | 0.487<br>(0.086-2.739)  | 0.405 | 4 (1.914%)                     | 3 (1.435%)                  | 0.746<br>(0.165-3.376)  | 0.703 | 11 (2.764%)                    |
| 30:02        | -                              | -                           | -                       | -     | 4 (1.914%)                     | 4 (1.914%)                  | 1.000<br>(0.247-4.053)  | 1     | 7 (1.759%)                     |
| 30:04        | -                              | -                           | -                       | -     | -                              | -                           | -                       | -     | 1 (0.251%)                     |
| 31:01        | 7 (9.091%)                     | 8 (10.390%)                 | 1.159<br>(0.399-3.372)  | 0.786 | 10 (4.785%)                    | 13 (6.220%)                 | 1.320<br>(0.565-3.081)  | 0.52  | 13 (3.266%)                    |
| 32:01        | 0 (0)                          | 1 (1.299%)                  | -                       | 0.316 | 14 (6.699%)                    | 11 (5.263%)                 | 0.774<br>(0.343-1.747)  | 0.536 | 27 (6.784%)                    |
| 33:01        | -                              | -                           | -                       | -     | 3 (1.435%)                     | 1 (0.478%)                  | 0.330<br>(0.034-3.200)  | 0.315 | 7 (1.759%)                     |
| 33:03        | 24 (31.169%)                   | 16 (20.779%)                | 0.579<br>(0.279-1.204)  | 0.142 | -                              | -                           | -                       | -     | 2 (0.503%)                     |
| 34:01        | -                              | -                           | -                       | -     | -                              | -                           | -                       | -     | -                              |
| 66:01        | -                              | -                           | -                       | -     | 1 (0.478%)                     | 0 (0)                       | -                       | 0.317 | 3 (0.754%)                     |
| 68:01        | 2 (2.597%)                     | 0 (0)                       | -                       | 0.155 | 8 (3.828%)                     | 8 (3.828%)                  | 1.000<br>(0.368-2.716)  | 1     | 16 (4.020%)                    |
| 68:02        | 1 (1.299%)                     | 0 (0)                       | -                       | 0.316 | 3 (1.435%)                     | 1 (0.478%)                  | 0.330<br>(0.034-3.200)  | 0.315 | 5 (1.256%)                     |
| 69:01        | -                              | -                           | -                       | -     | -                              | -                           | -                       | -     | 1 (0.251%)                     |
| 74:03        | -                              | -                           | -                       | -     | 1 (0.478%)                     | 0 (0)                       | -                       | 0.317 | -                              |

Association of HLA-A alleles with narcolepsy in individuals matched for HLA-DRB1, HLA-DQB1 and HLA-DQA1 alleles. P values calculated with  $\chi^2$  test and Maentel Haenszel test. CI = confidence interval.

Table S5. continued

| White imputed (N=796)       |                         |       | Asian imputed (N=744)          |                             |                         |       | Meta-analysis |                         |       |                         |
|-----------------------------|-------------------------|-------|--------------------------------|-----------------------------|-------------------------|-------|---------------|-------------------------|-------|-------------------------|
| N cases (carrier frequency) | OR (CI lower - upper)   | P     | N controls (carrier frequency) | N cases (carrier frequency) | OR (CI lower - upper)   | P     | Allele        | OR                      | P     | P test of heterogeneity |
| 84 (21.106%)                | 0.971<br>(0.691-1.362)  | 0.863 | 37 (9.946%)                    | 27 (7.258%)                 | 0.709<br>(0.422-1.190)  | 0.191 | 01:01         | 0.904<br>(0.714-1.144)  | 0.401 | 0.692                   |
| -                           | -                       | -     | -                              | -                           | -                       | -     | 01:02         | -                       | 0.317 | -                       |
| 182 (45.729%)               | 0.990<br>(0.749-1.308)  | 0.943 | 133 (35.753%)                  | 108 (29.032%)               | 0.735<br>(0.540-1.001)  | 0.05  | 02:01         | 0.912<br>(0.765-1.087)  | 0.303 | 0.384                   |
| 1 (0.251%)                  | -                       | 0.317 | -                              | -                           | -                       | -     | 02:02         | -                       | 0.317 | -                       |
| -                           | -                       | -     | 1 (0.269%)                     | 1 (0.269%)                  | 1.000<br>(0.062-16.047) | 1     | 02:03         | 1.000<br>(0.062-16.047) | 1     | 1                       |
| 8 (2.010%)                  | 1.146<br>(0.412-3.190)  | 0.794 | 4 (1.075%)                     | 3 (0.806%)                  | 0.748<br>(0.166-3.365)  | 0.704 | 02:05         | 1.145<br>(0.556-2.361)  | 0.713 | 0.748                   |
| 0 (0)                       | -                       | 0.317 | 63 (16.935%)                   | 77 (20.699%)                | 1.280<br>(0.885-1.852)  | 0.189 | 02:06         | 1.152<br>(0.828-1.602)  | 0.401 | 0.431                   |
| -                           | -                       | -     | 25 (6.720%)                    | 41 (11.022%)                | 1.719<br>(1.023-2.891)  | 0.039 | 02:07         | 1.661<br>(1.006-2.744)  | 0.046 | 0.605                   |
| -                           | -                       | -     | -                              | -                           | -                       | -     | 02:10         | 1.000<br>(0.137-7.286)  | 1     | 1                       |
| -                           | -                       | -     | -                              | -                           | -                       | -     | 02:17         | -                       | 0.317 | -                       |
| 139 (34.925%)               | 0.978<br>(0.731-1.309)  | 0.882 | 44 (11.828%)                   | 31 (8.333%)                 | 0.678<br>(0.418-1.100)  | 0.113 | 03:01         | 0.785<br>(0.636-0.970)  | 0.024 | 0.138                   |
| -                           | -                       | -     | 4 (1.075%)                     | 1 (0.269%)                  | 0.248<br>(0.028-2.229)  | 0.178 | 03:02         | 0.499<br>(0.091-2.729)  | 0.413 | 0                       |
| 52 (13.065%)                | 1.122<br>(0.736-1.711)  | 0.591 | 107 (28.763%)                  | 139 (37.366%)               | 1.477<br>(1.086-2.009)  | 0.013 | 11:01         | 1.431<br>(1.154-1.775)  | 0.001 | 0.554                   |
| -                           | -                       | -     | 3 (0.806%)                     | 1 (0.269%)                  | 0.332<br>(0.034-3.202)  | 0.316 | 11:02         | 0.332<br>(0.034-3.202)  | 0.316 | 1                       |
| 20 (5.025%)                 | 0.950<br>(0.507-1.781)  | 0.873 | 2 (0.538%)                     | 1 (0.269%)                  | 0.499<br>(0.045-5.523)  | 0.563 | 23:01         | 1.000<br>(0.580-1.725)  | 1     | 0.687                   |
| 84 (21.106%)                | 1.047<br>(0.743-1.475)  | 0.793 | 127 (34.140%)                  | 134 (36.022%)               | 1.086<br>(0.804-1.468)  | 0.591 | 24:02         | 1.047<br>(0.859-1.278)  | 0.648 | 0.982                   |
| -                           | -                       | -     | 2 (0.538%)                     | 1 (0.269%)                  | 0.499<br>(0.045-5.523)  | 0.563 | 24:03         | 1.000<br>(0.140-7.118)  | 1     | 0                       |
| -                           | -                       | -     | -                              | -                           | -                       | -     | 24:20         | -                       | 0.317 | -                       |
| 26 (6.533%)                 | 1.195<br>(0.665-2.145)  | 0.551 | -                              | -                           | -                       | -     | 25:01         | 1.246<br>(0.786-1.976)  | 0.349 | 0.819                   |
| 19 (4.774%)                 | 1.124<br>(0.575-2.195)  | 0.733 | 25 (6.720%)                    | 21 (5.645%)                 | 0.830<br>(0.456-1.511)  | 0.543 | 26:01         | 1.103<br>(0.748-1.628)  | 0.62  | 0.148                   |
| -                           | -                       | -     | -                              | -                           | -                       | -     | 26:02         | 1.000<br>(0.061-16.281) | 1     | 1                       |
| -                           | -                       | -     | 1 (0.269%)                     | 0 (0)                       | -                       | 0.317 | 26:03         | 1.000<br>(0.139-7.191)  | 1     | 0                       |
| 1 (0.251%)                  | 0.248<br>(0.028-2.230)  | 0.178 | 5 (1.344%)                     | 6 (1.613%)                  | 1.203<br>(0.364-3.978)  | 0.761 | 29:01         | 0.776<br>(0.287-2.094)  | 0.615 | 0.213                   |
| 13 (3.266%)                 | 0.400<br>(0.206-0.776)  | 0.005 | -                              | -                           | -                       | -     | 29:02         | 0.504<br>(0.301-0.846)  | 0.008 | 0.244                   |
| 11 (2.764%)                 | 1.000<br>(0.428-2.334)  | 1     | 35 (9.409%)                    | 29 (7.796%)                 | 0.814<br>(0.487-1.362)  | 0.433 | 30:01         | 0.823<br>(0.547-1.239)  | 0.35  | 0.902                   |
| 8 (2.010%)                  | 1.146<br>(0.412-3.190)  | 0.794 | 0 (0)                          | 1 (0.269%)                  | -                       | 0.317 | 30:02         | 1.185<br>(0.527-2.666)  | 0.681 | 0.805                   |
| 0 (0)                       | -                       | 0.317 | -                              | -                           | -                       | -     | 30:04         | -                       | 0.317 | -                       |
| 16 (4.020%)                 | 1.240<br>(0.589-2.614)  | 0.57  | 34 (9.140%)                    | 33 (8.871%)                 | 0.968<br>(0.586-1.599)  | 0.898 | 31:01         | 1.102<br>(0.775-1.566)  | 0.591 | 0.911                   |
| 24 (6.030%)                 | 0.882<br>(0.500-1.557)  | 0.664 | 9 (2.419%)                     | 8 (2.151%)                  | 0.886<br>(0.338-2.323)  | 0.806 | 32:01         | 0.874<br>(0.576-1.325)  | 0.525 | 0.957                   |
| 7 (1.759%)                  | 1.000<br>(0.348-2.878)  | 1     | 1 (0.269%)                     | 1 (0.269%)                  | 1.000<br>(0.062-16.047) | 1     | 33:01         | 0.816<br>(0.336-1.981)  | 0.653 | 0.68                    |
| 0 (0)                       | -                       | 0.157 | 30 (8.065%)                    | 26 (6.989%)                 | 0.857<br>(0.496-1.479)  | 0.578 | 33:03         | 0.714<br>(0.463-1.100)  | 0.126 | 0.389                   |
| -                           | -                       | -     | 1 (0.269%)                     | 0 (0)                       | -                       | 0.317 | 34:01         | -                       | 0.317 | -                       |
| 2 (0.503%)                  | 0.665<br>(0.111-4.001)  | 0.654 | -                              | -                           | -                       | -     | 66:01         | 0.498<br>(0.091-2.732)  | 0.413 | 0                       |
| 21 (5.276%)                 | 1.330<br>(0.683-2.588)  | 0.4   | 8 (2.151%)                     | 7 (1.882%)                  | 0.873 (0.313-2.431)     | 0.794 | 68:01         | 1.061<br>(0.658-1.711)  | 0.808 | 0.743                   |
| 8 (2.010%)                  | 1.612<br>(0.523-4.972)  | 0.402 | -                              | -                           | -                       | -     | 68:02         | 1.000<br>(0.395-2.534)  | 1     | 0.205                   |
| 1 (0.251%)                  | 1.000<br>(0.062-16.043) | 1     | 1 (0.269%)                     | 0 (0)                       | -                       | 0.317 | 69:01         | 0.499<br>(0.045-5.520)  | 0.564 | 0                       |
| -                           | -                       | -     | -                              | -                           | -                       | -     | 74:03         | -                       | 0.317 | -                       |

Confidence interval. Upper and lower limits represent 95 intervals. Cases and controls are matched for country, ethnicity and HLA-DRB1 and HLA-DQ genotypes.

Table S7. Association of HLA-C alleles with narcolepsy in individuals matched for HLA-DRB1, HLA-DQB1 and HLA-DQA1 alleles.

| HLA-C allele | Asian typed (N=156)       |                        |                      |       | White typed (N=424)       |                        |                      |       | White imputed             |                        |
|--------------|---------------------------|------------------------|----------------------|-------|---------------------------|------------------------|----------------------|-------|---------------------------|------------------------|
|              | N controls (carrier freq) | N cases (carrier freq) | OR (CI)              | P     | N controls (carrier freq) | N cases (carrier freq) | OR (CI)              | P     | N controls (carrier freq) | N cases (carrier freq) |
| 01:02        | 26 (33.333%)              | 24 (30.769%)           | 0.889 (0.454-1.742)  | 0.732 | 13 (6.132%)               | 9 (4.245%)             | 0.679 (0.284-1.623)  | 0.381 | 18 (4.523%)               | 27 (6.784%)            |
| 02:02        | 1 (1.282%)                | 0 (0)                  | -                    | 0.316 | 14 (6.604%)               | 18 (8.491%)            | 1.312 (0.635-2.712)  | 0.462 | 29 (7.286%)               | 29 (7.286%)            |
| 02:10        | -                         | -                      | -                    | -     | 2 (0.943%)                | 1 (0.472%)             | 0.498 (0.045-5.530)  | 0.562 | -                         | -                      |
| 03:01        | 0 (0)                     | 1 (1.282%)             | -                    | 0.316 | -                         | -                      | -                    | -     | -                         | -                      |
| 03:02        | 10 (12.821%)              | 6 (7.692%)             | 0.567 (0.195-1.644)  | 0.291 | -                         | -                      | -                    | -     | -                         | -                      |
| 03:03        | 21 (26.923%)              | 28 (35.897%)           | 1.520 (0.769-3.005)  | 0.227 | 14 (6.604%)               | 12 (5.660%)            | 0.849 (0.383-1.880)  | 0.686 | 41 (10.302%)              | 22 (5.528%)            |
| 03:04        | 15 (19.231%)              | 18 (23.077%)           | 1.260 (0.583-2.724)  | 0.556 | 32 (15.094%)              | 22 (10.377%)           | 0.651 (0.365-1.163)  | 0.145 | 37 (9.296%)               | 35 (8.794%)            |
| 03:14        | -                         | -                      | -                    | -     | 0 (0)                     | 1 (0.472%)             | -                    | 0.317 | -                         | -                      |
| 04:01        | 11 (14.103%)              | 9 (11.538%)            | 0.794 (0.309-2.040)  | 0.632 | 29 (13.679%)              | 26 (12.264%)           | 0.882 (0.500-1.556)  | 0.665 | 58 (14.573%)              | 81 (20.352%)           |
| 04:03        | -                         | -                      | -                    | -     | -                         | -                      | -                    | -     | -                         | -                      |
| 05:01        | 2 (2.564%)                | 1 (1.282%)             | 0.494 (0.044-5.557)  | 0.56  | 30 (14.151%)              | 25 (11.792%)           | 0.811 (0.459-1.432)  | 0.47  | 65 (16.332%)              | 46 (11.558%)           |
| 06:02        | 6 (7.692%)                | 3 (3.846%)             | 0.480 (0.116-1.992)  | 0.303 | 22 (10.377%)              | 22 (10.377%)           | 1.000 (0.536-1.867)  | 1     | 53 (13.317%)              | 56 (14.070%)           |
| 07:01        | 4 (5.128%)                | 3 (3.846%)             | 0.740 (0.160-3.421)  | 0.699 | 52 (24.528%)              | 52 (24.528%)           | 1.000 (0.642-1.557)  | 1     | 90 (22.613%)              | 81 (20.352%)           |
| 07:02        | 13 (16.667%)              | 12 (15.385%)           | 0.909 (0.386-2.140)  | 0.827 | 133 (62.736%)             | 133 (62.736%)          | 1.000 (0.675-1.482)  | 1     | 228 (57.286%)             | 228 (57.286%)          |
| 07:04        | 2 (2.564%)                | 1 (1.282%)             | 0.494 (0.044-5.557)  | 0.56  | 6 (2.830%)                | 8 (3.774%)             | 1.346 (0.459-3.949)  | 0.587 | 6 (1.508%)                | 15 (3.769%)            |
| 08:01        | 15 (19.231%)              | 17 (21.795%)           | 1.170 (0.537-2.549)  | 0.692 | -                         | -                      | -                    | -     | 1 (0.251%)                | 0 (0)                  |
| 08:02        | -                         | -                      | -                    | -     | 10 (4.717%)               | 14 (6.604%)            | 1.428 (0.620-3.291)  | 0.401 | 19 (4.774%)               | 27 (6.784%)            |
| 08:03        | 1 (1.282%)                | 0 (0)                  | -                    | 0.316 | -                         | -                      | -                    | -     | -                         | -                      |
| 12:02        | 3 (3.846%)                | 2 (2.564%)             | 0.658 (0.107-4.050)  | 0.649 | 1 (0.472%)                | 4 (1.887%)             | 4.058 (0.450-36.608) | 0.177 | 3 (0.754%)                | 2 (0.503%)             |
| 12:03        | 0 (0)                     | 1 (1.282%)             | -                    | 0.316 | 14 (6.604%)               | 32 (15.094%)           | 2.514 (1.300-4.863)  | 0.005 | 46 (11.558%)              | 56 (14.070%)           |
| 14:02        | 10 (12.821%)              | 11 (14.103%)           | 1.116 (0.445-2.803)  | 0.815 | 1 (0.472%)                | 2 (0.943%)             | 2.010 (0.181-22.330) | 0.562 | 10 (2.513%)               | 11 (2.764%)            |
| 14:03        | 8 (10.256%)               | 4 (5.128%)             | 0.473 (0.136-1.641)  | 0.229 | -                         | -                      | -                    | -     | -                         | -                      |
| 15:02        | 2 (2.564%)                | 7 (8.974%)             | 3.746 (0.753-18.639) | 0.086 | 6 (2.830%)                | 8 (3.774%)             | 1.346 (0.459-3.949)  | 0.587 | 13 (3.266%)               | 16 (4.020%)            |
| 15:05        | -                         | -                      | -                    | -     | -                         | -                      | -                    | -     | 3 (0.754%)                | 3 (0.754%)             |
| 16:01        | -                         | -                      | -                    | -     | 12 (5.660%)               | 8 (3.774%)             | 0.654 (0.262-1.633)  | 0.36  | 29 (7.286%)               | 10 (2.513%)            |
| 16:02        | -                         | -                      | -                    | -     | 1 (0.472%)                | 2 (0.943%)             | 2.010 (0.181-22.330) | 0.562 | 3 (0.754%)                | 2 (0.503%)             |
| 16:04        | -                         | -                      | -                    | -     | 0 (0)                     | 1 (0.472%)             | -                    | 0.317 | 0 (0)                     | 2 (0.503%)             |
| 17:01        | -                         | -                      | -                    | -     | 0 (0)                     | 2 (0.943%)             | -                    | 0.156 | 7 (1.759%)                | 5 (1.256%)             |
| 17:03        | -                         | -                      | -                    | -     | 0 (0)                     | 1 (0.472%)             | -                    | 0.317 | -                         | -                      |
| 18:01        | -                         | -                      | -                    | -     | 1 (0.472%)                | 0 (0)                  | -                    | 0.317 | -                         | -                      |

Association of HLA-C alleles with narcolepsy in individuals matched for HLA-DRB1, HLA-DQB1 and HLA-DQA1 alleles. P values calculated with  $\chi^2$  test and matched ethnicity and HLA-DRB1 and HLA-DQ genotypes.

Table S7. continued

| d (N=796)           |       | Asian imputed (N=744)     |                        |                      |       | Meta-analysis |                      |       |                 |
|---------------------|-------|---------------------------|------------------------|----------------------|-------|---------------|----------------------|-------|-----------------|
| OR (CI)             | P     | N controls (carrier freq) | N cases (carrier freq) | OR (CI)              | P     | Allele        | OR (CI)              | P     | P heterogeneity |
| 1.536 (0.832-2.837) | 0.167 | 69 (18.548%)              | 77 (20.699%)           | 1.146 (0.798-1.647)  | 0.46  | 01:02         | 1.108 (0.848-1.448)  | 0.453 | 0.432           |
| 1.000 (0.586-1.707) | 1     | 5 (1.344%)                | 6 (1.613%)             | 1.203 (0.364-3.978)  | 0.761 | 02:02         | 1.088 (0.728-1.626)  | 0.682 | 0.827           |
| -                   | -     | -                         | -                      | -                    | -     | 02:10         | 0.498 (0.045-5.530)  | 0.563 | 0               |
| -                   | -     | -                         | -                      | -                    | -     | 03:01         | -                    | 0.317 | -               |
| -                   | -     | 21 (5.645%)               | 17 (4.570%)            | 0.800 (0.415-1.543)  | 0.505 | 03:02         | 0.727 (0.416-1.269)  | 0.261 | 0.588           |
| 0.509 (0.298-0.872) | 0.013 | 99 (26.613%)              | 103 (27.688%)          | 1.056 (0.764-1.459)  | 0.742 | 03:03         | 0.927 (0.728-1.180)  | 0.538 | 0.059           |
| 0.941 (0.579-1.527) | 0.805 | 73 (19.624%)              | 59 (15.860%)           | 0.772 (0.529-1.127)  | 0.179 | 03:04         | 0.830 (0.647-1.066)  | 0.144 | 0.533           |
| -                   | -     | -                         | -                      | -                    | -     | 03:14         | -                    | 0.317 | -               |
| 1.498 (1.034-2.169) | 0.032 | 37 (9.946%)               | 42 (11.290%)           | 1.152 (0.722-1.839)  | 0.552 | 04:01         | 1.201 (0.938-1.540)  | 0.147 | 0.352           |
| -                   | -     | 3 (0.806%)                | 2 (0.538%)             | 0.665 (0.110-4.002)  | 0.654 | 04:03         | 0.665 (0.110-4.002)  | 0.654 | 1               |
| 0.669 (0.446-1.005) | 0.052 | 11 (2.957%)               | 10 (2.688%)            | 0.907 (0.380-2.161)  | 0.825 | 05:01         | 0.731 (0.538-0.993)  | 0.044 | 0.886           |
| 1.066 (0.711-1.597) | 0.757 | 66 (17.742%)              | 52 (13.978%)           | 0.753 (0.507-1.119)  | 0.16  | 06:02         | 0.890 (0.692-1.146)  | 0.368 | 0.512           |
| 0.874 (0.623-1.227) | 0.437 | 6 (1.613%)                | 6 (1.613%)             | 1.000 (0.320-3.129)  | 1     | 07:01         | 0.917 (0.709-1.187)  | 0.511 | 0.956           |
| 1.000 (0.755-1.324) | 1     | 117 (31.452%)             | 109 (29.301%)          | 0.903 (0.661-1.235)  | 0.524 | 07:02         | 0.963 (0.804-1.153)  | 0.679 | 0.963           |
| 2.559 (0.983-6.664) | 0.047 | 9 (2.419%)                | 9 (2.419%)             | 1.000 (0.392-2.548)  | 1     | 07:04         | 1.448 (0.845-2.483)  | 0.176 | 0.434           |
| -                   | 0.317 | 90 (24.194%)              | 95 (25.538%)           | 1.075 (0.771-1.499)  | 0.671 | 08:01         | 1.075 (0.793-1.458)  | 0.641 | 0.831           |
| 1.452 (0.793-2.656) | 0.224 | 1 (0.269%)                | 1 (0.269%)             | 1.000 (0.062-16.047) | 1     | 08:02         | 1.428 (0.882-2.312)  | 0.146 | 0.967           |
| -                   | -     | 0 (0)                     | 1 (0.269%)             | -                    | 0.317 | 08:03         | 1.000 (0.063-15.988) | 1     | -               |
| 0.665 (0.111-4.001) | 0.654 | 24 (6.452%)               | 22 (5.914%)            | 0.911 (0.502-1.656)  | 0.761 | 12:02         | 0.966 (0.577-1.617)  | 0.896 | 0.57            |
| 1.253 (0.825-1.902) | 0.289 | 16 (4.301%)               | 10 (2.688%)            | 0.615 (0.275-1.373)  | 0.231 | 12:03         | 1.343 (0.980-1.842)  | 0.066 | 0.027           |
| 1.103 (0.463-2.627) | 0.825 | 32 (8.602%)               | 36 (9.677%)            | 1.138 (0.691-1.876)  | 0.611 | 14:02         | 1.145 (0.778-1.685)  | 0.492 | 0.974           |
| -                   | -     | 7 (1.882%)                | 2 (0.538%)             | 0.282 (0.058-1.366)  | 0.094 | 14:03         | 0.382 (0.145-1.006)  | 0.044 | 0.613           |
| 1.240 (0.589-2.614) | 0.57  | 31 (8.333%)               | 37 (9.946%)            | 1.215 (0.737-2.004)  | 0.445 | 15:02         | 1.333 (0.918-1.938)  | 0.13  | 0.623           |
| 1.000 (0.201-4.985) | 1     | 2 (0.538%)                | 4 (1.075%)             | 2.011 (0.366-11.046) | 0.412 | 15:05         | 1.404 (0.444-4.441)  | 0.562 | 0.559           |
| 0.328 (0.158-0.682) | 0.002 | -                         | -                      | -                    | -     | 16:01         | 0.422 (0.240-0.744)  | 0.002 | 0.249           |
| 0.665 (0.111-4.001) | 0.654 | 0 (0)                     | 2 (0.538%)             | -                    | 0.157 | 16:02         | 1.503 (0.423-5.344)  | 0.526 | 0.357           |
| -                   | 0.157 | -                         | -                      | -                    | -     | 16:04         | -                    | 0.083 | -               |
| 0.711 (0.224-2.258) | 0.561 | 1 (0.269%)                | 0 (0)                  | -                    | 0.317 | 17:01         | 0.874 (0.315-2.424)  | 0.795 | 0               |
| -                   | -     | -                         | -                      | -                    | -     | 17:03         | -                    | 0.317 | -               |
| -                   | -     | -                         | -                      | -                    | -     | 18:01         | -                    | 0.317 | -               |

Continental Haenszel test. CI = confidence interval. Upper and lower limits represent 95 intervals. Cases and controls are matched for country,

Table S8. Association of HLA-A alleles with narcolepsy in individuals matched for HLA-DRB1, HLA-DQ and HLA-DP alleles.

| HLA-A allele | White imputed (N=490)     |                        |                      |       | Asian imputed (N=452)     |                        |                      |       | Asian typed (N=452)       |                        |
|--------------|---------------------------|------------------------|----------------------|-------|---------------------------|------------------------|----------------------|-------|---------------------------|------------------------|
|              | N controls (carrier freq) | N cases (carrier freq) | OR (CI)              | P     | N controls (carrier freq) | N cases (carrier freq) | OR (CI)              | P     | N controls (carrier freq) | N cases (carrier freq) |
| 01:01        | 55 (22.449%)              | 49 (20.000%)           | 0.864 (0.560-1.332)  | 0.507 | 14 (6.195%)               | 18 (7.965%)            | 1.310 (0.635-2.703)  | 0.463 | 0 (0)                     | 1 (5.882%)             |
| 02:01        | 105 (42.857%)             | 115 (46.939%)          | 1.179 (0.826-1.684)  | 0.364 | 86 (38.053%)              | 64 (28.319%)           | 0.643 (0.433-0.954)  | 0.028 | 6 (35.294%)               | 6 (35.294%)            |
| 02:03        | -                         | -                      | -                    | -     | 1 (0.442%)                | 0 (0)                  | -                    | 0.317 | -                         | -                      |
| 02:05        | 7 (2.857%)                | 6 (2.449%)             | 0.854 (0.283-2.577)  | 0.779 | 1 (0.442%)                | 1 (0.442%)             | 1.000 (0.062-16.086) | 1     | -                         | -                      |
| 02:06        | -                         | -                      | -                    | -     | 37 (16.372%)              | 50 (22.124%)           | 1.451 (0.905-2.327)  | 0.121 | 6 (35.294%)               | 5 (29.412%)            |
| 02:07        | -                         | -                      | -                    | -     | 16 (7.080%)               | 26 (11.504%)           | 1.706 (0.889-3.276)  | 0.105 | 1 (5.882%)                | 0 (0)                  |
| 02:10        | -                         | -                      | -                    | -     | -                         | -                      | -                    | -     | 2 (11.765%)               | 2 (11.765%)            |
| 02:17        | -                         | -                      | -                    | -     | -                         | -                      | -                    | -     | -                         | -                      |
| 03:01        | 90 (36.735%)              | 79 (32.245%)           | 0.820 (0.564-1.190)  | 0.296 | 20 (8.850%)               | 22 (9.735%)            | 1.111 (0.588-2.098)  | 0.746 | 2 (11.765%)               | 0 (0)                  |
| 03:02        | -                         | -                      | -                    | -     | 2 (0.885%)                | 1 (0.442%)             | 0.498 (0.045-5.529)  | 0.562 | -                         | -                      |
| 11:01        | 29 (11.837%)              | 35 (14.286%)           | 1.241 (0.732-2.104)  | 0.421 | 68 (30.088%)              | 71 (31.416%)           | 1.064 (0.714-1.587)  | 0.76  | 3 (17.647%)               | 8 (47.059%)            |
| 11:02        | -                         | -                      | -                    | -     | 2 (0.885%)                | 0 (0)                  | -                    | 0.156 | -                         | -                      |
| 23:01        | 13 (5.306%)               | 10 (4.082%)            | 0.759 (0.326-1.766)  | 0.522 | 1 (0.442%)                | 1 (0.442%)             | 1.000 (0.062-16.086) | 1     | -                         | -                      |
| 24:02        | 47 (19.184%)              | 45 (18.367%)           | 0.948 (0.602-1.492)  | 0.817 | 75 (33.186%)              | 81 (35.841%)           | 1.125 (0.763-1.658)  | 0.553 | 6 (35.294%)               | 3 (17.647%)            |
| 25:01        | 19 (7.755%)               | 24 (9.796%)            | 1.292 (0.688-2.425)  | 0.425 | -                         | -                      | -                    | -     | -                         | -                      |
| 26:01        | 10 (4.082%)               | 9 (3.673%)             | 0.896 (0.358-2.245)  | 0.815 | 18 (7.965%)               | 18 (7.965%)            | 1.000 (0.506-1.976)  | 1     | -                         | -                      |
| 26:02        | -                         | -                      | -                    | -     | -                         | -                      | -                    | -     | 0 (0)                     | 1 (5.882%)             |
| 29:01        | 1 (0.408%)                | 1 (0.408%)             | 1.000 (0.062-16.078) | 1     | 2 (0.885%)                | 3 (1.327%)             | 1.507 (0.249-9.104)  | 0.653 | -                         | -                      |
| 29:02        | 18 (7.347%)               | 9 (3.673%)             | 0.481 (0.212-1.093)  | 0.075 | -                         | -                      | -                    | -     | -                         | -                      |
| 30:01        | 7 (2.857%)                | 6 (2.449%)             | 0.854 (0.283-2.577)  | 0.779 | 27 (11.947%)              | 23 (10.177%)           | 0.835 (0.463-1.506)  | 0.549 | 1 (5.882%)                | 0 (0)                  |
| 30:02        | 4 (1.633%)                | 6 (2.449%)             | 1.513 (0.421-5.428)  | 0.523 | -                         | -                      | -                    | -     | -                         | -                      |
| 31:01        | 9 (3.673%)                | 17 (6.939%)            | 1.955 (0.854-4.476)  | 0.107 | 28 (12.389%)              | 16 (7.080%)            | 0.539 (0.283-1.026)  | 0.057 | 2 (11.765%)               | 3 (17.647%)            |
| 32:01        | 15 (6.122%)               | 17 (6.939%)            | 1.143 (0.558-2.344)  | 0.715 | 6 (2.655%)                | 7 (3.097%)             | 1.172 (0.388-3.543)  | 0.778 | -                         | -                      |
| 33:01        | 1 (0.408%)                | 2 (0.816%)             | 2.008 (0.181-22.293) | 0.563 | 0 (0)                     | 1 (0.442%)             | -                    | 0.317 | -                         | -                      |
| 33:03        | 1 (0.408%)                | 1 (0.408%)             | 1.000 (0.062-16.078) | 1     | 19 (8.407%)               | 16 (7.080%)            | 0.830 (0.415-1.659)  | 0.598 | 4 (23.529%)               | 3 (17.647%)            |
| 66:01        | 3 (1.224%)                | 1 (0.408%)             | 0.331 (0.034-3.200)  | 0.315 | -                         | -                      | -                    | -     | -                         | -                      |
| 68:01        | 11 (4.490%)               | 9 (3.673%)             | 0.811 (0.330-1.994)  | 0.648 | 5 (2.212%)                | 3 (1.327%)             | 0.595 (0.140-2.518)  | 0.476 | -                         | -                      |
| 68:02        | 5 (2.041%)                | 4 (1.633%)             | 0.797 (0.211-3.003)  | 0.737 | -                         | -                      | -                    | -     | -                         | -                      |
| 69:01        | 1 (0.408%)                | 0 (0)                  | -                    | 0.317 | -                         | -                      | -                    | -     | -                         | -                      |
| 74:03        | -                         | -                      | -                    | -     | -                         | -                      | -                    | -     | -                         | -                      |

Association of HLA-A alleles with narcolepsy in individuals matched for HLA-DRB1, HLA-DQ and HLA-DP alleles. P values calculated with  $\chi^2$  test and Maentel-Hay ethnicity and HLA-DRB1, HLA-DQ and HLA-DP genotypes.

Table S8. continued

| (N=34)               |       | White typed (N=194)       |                        |                      |       | Meta-analysis |                     |       |                         |
|----------------------|-------|---------------------------|------------------------|----------------------|-------|---------------|---------------------|-------|-------------------------|
| OR (CI)              | P     | N controls (carrier freq) | N cases (carrier freq) | OR (CI)              | P     | Allele        | OR (CI)             | P     | P test of heterogeneity |
| -                    | 0.31  | 28 (28.866%)              | 25 (25.773%)           | 0.856 (0.455-1.610)  | 0.629 | 01:01         | 0.948 (0.690-1.304) | 0.745 | 0.593                   |
| 1.000 (0.245-4.083)  | 1     | 50 (51.546%)              | 54 (55.670%)           | 1.180 (0.671-2.077)  | 0.565 | 02:01         | 0.944 (0.747-1.194) | 0.632 | 0.125                   |
| -                    | -     | -                         | -                      | -                    | -     | 02:03         | -                   | 0.317 | -                       |
| -                    | -     | 1 (1.031%)                | 2 (2.062%)             | 2.021 (0.180-22.664) | 0.561 | 02:05         | 1.000 (0.393-2.545) | 1     | 0.817                   |
| 0.764 (0.181-3.229)  | 0.714 | 1 (1.031%)                | 0 (0)                  | -                    | 0.316 | 02:06         | 1.323 (0.849-2.062) | 0.216 | 0.401                   |
| -                    | 0.31  | -                         | -                      | -                    | -     | 02:07         | 1.594 (0.841-3.020) | 0.15  | 0                       |
| 1.000 (0.124-8.057)  | 1     | -                         | -                      | -                    | -     | 02:10         | 1.000 (0.124-8.057) | 1     | 1                       |
| -                    | -     | 0 (0)                     | 1 (1.031%)             | -                    | 0.316 | 02:17         | -                   | 0.317 | -                       |
| -                    | 0.145 | 42 (43.299%)              | 29 (29.897%)           | 0.558 (0.309-1.009)  | 0.053 | 03:01         | 0.783 (0.591-1.036) | 0.087 | 0.29                    |
| -                    | -     | -                         | -                      | -                    | -     | 03:02         | 0.498 (0.045-5.529) | 0.563 | 1                       |
| 4.148 (0.864-19.920) | 0.067 | 7 (7.216%)                | 17 (17.526%)           | 2.732 (1.078-6.927)  | 0.029 | 11:01         | 1.304 (0.973-1.748) | 0.074 | 0.136                   |
| -                    | -     | -                         | -                      | -                    | -     | 11:02         | -                   | 0.157 | -                       |
| -                    | -     | 4 (4.124%)                | 1 (1.031%)             | 0.242 (0.027-2.207)  | 0.174 | 23:01         | 0.656 (0.311-1.381) | 0.264 | 0.611                   |
| 0.393 (0.080-1.936)  | 0.244 | 17 (17.526%)              | 14 (14.433%)           | 0.794 (0.367-1.716)  | 0.557 | 24:02         | 0.981 (0.749-1.286) | 0.89  | 0.562                   |
| -                    | -     | 3 (3.093%)                | 5 (5.155%)             | 1.703 (0.396-7.332)  | 0.47  | 25:01         | 1.350 (0.758-2.406) | 0.307 | 0.733                   |
| -                    | -     | 2 (2.062%)                | 3 (3.093%)             | 1.516 (0.248-9.280)  | 0.65  | 26:01         | 1.000 (0.593-1.686) | 1     | 0.879                   |
| -                    | 0.31  | -                         | -                      | -                    | -     | 26:02         | -                   | 0.317 | -                       |
| -                    | -     | -                         | -                      | -                    | -     | 29:01         | 1.337 (0.297-6.012) | 0.704 | 0.808                   |
| -                    | -     | 4 (4.124%)                | 3 (3.093%)             | 0.742 (0.162-3.407)  | 0.7   | 29:02         | 0.529 (0.257-1.086) | 0.079 | 0.623                   |
| -                    | 0.31  | 2 (2.062%)                | 3 (3.093%)             | 1.516 (0.248-9.280)  | 0.65  | 30:01         | 0.853 (0.520-1.399) | 0.529 | 0.822                   |
| -                    | -     | 1 (1.031%)                | 1 (1.031%)             | 1.000 (0.062-16.219) | 1     | 30:02         | 1.409 (0.443-4.486) | 0.561 | 0.791                   |
| 1.607 (0.233-11.092) | 0.628 | 3 (3.093%)                | 6 (6.186%)             | 2.066 (0.502-8.509)  | 0.306 | 31:01         | 1.000 (0.641-1.560) | 1     | 0.063                   |
| -                    | -     | 4 (4.124%)                | 6 (6.186%)             | 1.533 (0.419-5.612)  | 0.516 | 32:01         | 1.213 (0.703-2.092) | 0.489 | 0.926                   |
| -                    | -     | 2 (2.062%)                | 1 (1.031%)             | 0.495 (0.044-5.549)  | 0.561 | 33:01         | 1.337 (0.297-6.012) | 0.705 | 0.384                   |
| 0.696 (0.130-3.724)  | 0.671 | -                         | -                      | -                    | -     | 33:03         | 0.818 (0.438-1.525) | 0.528 | 0.972                   |
| -                    | -     | 1 (1.031%)                | 0 (0)                  | -                    | 0.316 | 66:01         | 0.248 (0.028-2.229) | 0.179 | 0                       |
| -                    | -     | 3 (3.093%)                | 5 (5.155%)             | 1.703 (0.396-7.332)  | 0.47  | 68:01         | 0.891 (0.458-1.735) | 0.735 | 0.577                   |
| -                    | -     | 3 (3.093%)                | 0 (0)                  | -                    | 0.081 | 68:02         | 0.495 (0.148-1.657) | 0.245 | 0                       |
| -                    | -     | -                         | -                      | -                    | -     | 69:01         | -                   | 0.317 | -                       |
| -                    | -     | 1 (1.031%)                | 0 (0)                  | -                    | 0.316 | 74:03         | -                   | 0.317 | -                       |

enszel test. CI = confidence interval. Upper and lower limits represent 95 intervals. Cases and controls are matched for country,

Table S10. Association of HLA-C alleles with narcolepsy in individuals matched for HLA-DRB1, HLA-DQ and HLA-DP alleles.

| HLA-C allele | White imputed (N=490)     |                        |                         |       | Asian imputed (N=452)     |                        |                         |       | Asian type                |                        |
|--------------|---------------------------|------------------------|-------------------------|-------|---------------------------|------------------------|-------------------------|-------|---------------------------|------------------------|
|              | N controls (carrier freq) | N cases (carrier freq) | OR (CI)                 | P     | N controls (carrier freq) | N cases (carrier freq) | OR (CI)                 | P     | N controls (carrier freq) | N cases (carrier freq) |
| 01:02        | 10 (4.082%)               | 15 (6.122%)            | 1.533<br>(0.675-3.482)  | 0.305 | 46 (20.354%)              | 50 (22.124%)           | 1.112<br>(0.708-1.745)  | 0.646 | 5 (29.412%)               | 6 (35.294%)            |
| 02:02        | 16 (6.531%)               | 16 (6.531%)            | 1.000<br>(0.488-2.048)  | 1     | 2 (0.885%)                | 4 (1.770%)             | 2.018<br>(0.366-11.130) | 0.411 | -                         | -                      |
| 03:02        | 0 (0)                     | 1 (0.408%)             | -                       | 0.317 | 15 (6.637%)               | 12 (5.310%)            | 0.789<br>(0.361-1.725)  | 0.552 | -                         | -                      |
| 03:03        | 23 (9.388%)               | 8 (3.265%)             | 0.326<br>(0.143-0.744)  | 0.005 | 63 (27.876%)              | 61 (26.991%)           | 0.957<br>(0.633-1.446)  | 0.833 | 7 (41.176%)               | 5 (29.412%)            |
| 03:04        | 21 (8.571%)               | 19 (7.755%)            | 0.897<br>(0.469-1.713)  | 0.741 | 44 (19.469%)              | 45 (19.912%)           | 1.028<br>(0.647-1.635)  | 0.906 | 3 (17.647%)               | 6 (35.294%)            |
| 04:01        | 32 (13.061%)              | 47 (19.184%)           | 1.580<br>(0.969-2.577)  | 0.065 | 26 (11.504%)              | 23 (10.177%)           | 0.872<br>(0.481-1.579)  | 0.65  | 1 (5.882%)                | 3 (17.647%)            |
| 04:03        | -                         | -                      | -                       | -     | 1 (0.442%)                | 0 (0)                  | -                       | 0.317 | -                         | -                      |
| 05:01        | 37 (15.102%)              | 34 (13.878%)           | 0.906<br>(0.548-1.499)  | 0.7   | 5 (2.212%)                | 4 (1.770%)             | 0.796<br>(0.211-3.005)  | 0.736 | -                         | -                      |
| 06:02        | 34 (13.878%)              | 35 (14.286%)           | 1.034<br>(0.622-1.721)  | 0.897 | 41 (18.142%)              | 36 (15.929%)           | 0.855<br>(0.523-1.397)  | 0.532 | 2 (11.765%)               | 0 (0)                  |
| 07:01        | 58 (23.673%)              | 45 (18.367%)           | 0.725<br>(0.468-1.123)  | 0.149 | 3 (1.327%)                | 8 (3.540%)             | 2.728<br>(0.714-10.417) | 0.127 | -                         | -                      |
| 07:02        | 135 (55.102%)             | 148 (60.408%)          | 1.243<br>(0.868-1.780)  | 0.234 | 64 (28.319%)              | 67 (29.646%)           | 1.067<br>(0.710-1.602)  | 0.756 | 1 (5.882%)                | 2 (11.765%)            |
| 07:04        | 4 (1.633%)                | 6 (2.449%)             | 1.513<br>(0.421-5.428)  | 0.523 | 6 (2.655%)                | 3 (1.327%)             | 0.493<br>(0.122-1.997)  | 0.312 | 1 (5.882%)                | 1 (5.882%)             |
| 08:01        | 1 (0.408%)                | 0 (0)                  | -                       | 0.317 | 62 (27.434%)              | 51 (22.566%)           | 0.771<br>(0.503-1.182)  | 0.232 | 5 (29.412%)               | 4 (23.529%)            |
| 08:02        | 10 (4.082%)               | 12 (4.898%)            | 1.210<br>(0.513-2.856)  | 0.663 | 0 (0)                     | 1 (0.442%)             | -                       | 0.317 | -                         | -                      |
| 08:03        | -                         | -                      | -                       | -     | -                         | -                      | -                       | -     | 1 (5.882%)                | 0 (0)                  |
| 12:02        | 1 (0.408%)                | 3 (1.224%)             | 3.025<br>(0.312-29.282) | 0.315 | 13 (5.752%)               | 7 (3.097%)             | 0.524<br>(0.205-1.338)  | 0.17  | -                         | -                      |
| 12:03        | 34 (13.878%)              | 38 (15.510%)           | 1.139<br>(0.690-1.880)  | 0.61  | 6 (2.655%)                | 8 (3.540%)             | 1.346<br>(0.459-3.942)  | 0.587 | -                         | -                      |
| 14:02        | 9 (3.673%)                | 2 (0.816%)             | 0.216<br>(0.046-1.009)  | 0.033 | 21 (9.292%)               | 26 (11.504%)           | 1.269<br>(0.692-2.329)  | 0.441 | 5 (29.412%)               | 2 (11.765%)            |
| 14:03        | 0 (0)                     | 1 (0.408%)             | -                       | 0.317 | 5 (2.212%)                | 3 (1.327%)             | 0.595<br>(0.140-2.518)  | 0.476 | 1 (5.882%)                | 1 (5.882%)             |
| 15:02        | 12 (4.898%)               | 14 (5.714%)            | 1.177<br>(0.533-2.599)  | 0.687 | 19 (8.407%)               | 13 (5.752%)            | 0.665<br>(0.320-1.381)  | 0.271 | 0 (0)                     | 2 (11.765%)            |
| 15:05        | 1 (0.408%)                | 0 (0)                  | -                       | 0.317 | 0 (0)                     | 3 (1.327%)             | -                       | 0.082 | -                         | -                      |
| 16:01        | 18 (7.347%)               | 6 (2.449%)             | 0.317<br>(0.123-0.812)  | 0.012 | -                         | -                      | -                       | -     | -                         | -                      |
| 16:02        | 2 (0.816%)                | 3 (1.224%)             | 1.506<br>(0.249-9.094)  | 0.653 | -                         | -                      | -                       | -     | -                         | -                      |
| 17:01        | 2 (0.816%)                | 3 (1.224%)             | 1.506<br>(0.249-9.094)  | 0.653 | -                         | -                      | -                       | -     | -                         | -                      |

Association of HLA-C alleles with narcolepsy in individuals matched for HLA-DRB1, HLA-DQ and HLA-DP alleles. P values calculated with  $\chi^2$  test and Maentel Haer HLA-DRB1, HLA-DQ and HLA-DP genotypes.

Table S10. continued

| d (N=34)                |           | White typed (N=194)          |                           |                         |       | Meta-analysis |                         |       |                 |
|-------------------------|-----------|------------------------------|---------------------------|-------------------------|-------|---------------|-------------------------|-------|-----------------|
| OR (CI)                 | P         | N controls<br>(carrier freq) | N cases<br>(carrier freq) | OR (CI)                 | P     | Allele        | OR (CI)                 | P     | P heterogeneity |
| 1.309<br>(0.310-5.533)  | 0.71<br>4 | 6 (6.186%)                   | 4 (4.124%)                | 0.652<br>(0.178-2.388)  | 0.516 | 01:02         | 1.148<br>(0.797-1.651)  | 0.459 | 0.739           |
| -                       | -         | 4 (4.124%)                   | 8 (8.247%)                | 2.090<br>(0.608-7.185)  | 0.233 | 02:02         | 1.291<br>(0.727-2.295)  | 0.383 | 0.513           |
| -                       | -         | -                            | -                         | -                       | -     | 03:02         | 0.859<br>(0.400-1.846)  | 0.697 | 0               |
| 0.595<br>(0.144-2.467)  | 0.47<br>3 | 6 (6.186%)                   | 7 (7.216%)                | 1.180<br>(0.382-3.647)  | 0.774 | 03:03         | 0.771<br>(0.552-1.078)  | 0.127 | 0.116           |
| 2.545<br>(0.516-12.546) | 0.24<br>4 | 13 (13.402%)                 | 8 (8.247%)                | 0.581<br>(0.229-1.472)  | 0.248 | 03:04         | 0.956<br>(0.681-1.342)  | 0.796 | 0.443           |
| 3.429<br>(0.319-36.828) | 0.28<br>7 | 11 (11.340%)                 | 14 (14.433%)              | 1.319<br>(0.566-3.071)  | 0.52  | 04:01         | 1.286<br>(0.917-1.803)  | 0.144 | 0.394           |
| -                       | -         | -                            | -                         | -                       | -     | 04:03         | -                       | 0.317 | -               |
| -                       | -         | 16 (16.495%)                 | 11 (11.340%)              | 0.648<br>(0.284-1.478)  | 0.3   | 05:01         | 0.823<br>(0.547-1.238)  | 0.351 | 0.792           |
| -                       | 0.14<br>5 | 7 (7.216%)                   | 10 (10.309%)              | 1.478<br>(0.538-4.057)  | 0.446 | 06:02         | 0.958<br>(0.689-1.333)  | 0.801 | 0.606           |
| -                       | -         | 33 (34.021%)                 | 24 (24.742%)              | 0.638<br>(0.342-1.190)  | 0.156 | 07:01         | 0.774<br>(0.550-1.088)  | 0.14  | 0.146           |
| 2.133<br>(0.175-26.033) | 0.54<br>5 | 60 (61.856%)                 | 62 (63.918%)              | 1.092<br>(0.610-1.956)  | 0.766 | 07:02         | 1.157<br>(0.907-1.475)  | 0.24  | 0.902           |
| 1.000<br>(0.057-17.411) | 1         | 1 (1.031%)                   | 5 (5.155%)                | 5.217<br>(0.598-45.513) | 0.097 | 07:04         | 1.256<br>(0.583-2.705)  | 0.56  | 0.323           |
| 0.738<br>(0.160-3.414)  | 0.69<br>7 | -                            | -                         | -                       | -     | 08:01         | 0.754<br>(0.500-1.136)  | 0.177 | 0.916           |
| -                       | -         | 4 (4.124%)                   | 6 (6.186%)                | 1.533<br>(0.419-5.612)  | 0.516 | 08:02         | 1.377<br>(0.679-2.791)  | 0.374 | 0.737           |
| -                       | 0.31      | -                            | -                         | -                       | -     | 08:03         | -                       | 0.317 | -               |
| -                       | -         | 0 (0)                        | 3 (3.093%)                | -                       | 0.081 | 12:02         | 0.926<br>(0.430-1.994)  | 0.845 | 0.116           |
| -                       | -         | 6 (6.186%)                   | 12 (12.371%)              | 2.141<br>(0.769-5.959)  | 0.138 | 12:03         | 1.302<br>(0.862-1.967)  | 0.21  | 0.553           |
| 0.320<br>(0.053-1.949)  | 0.20<br>3 | 1 (1.031%)                   | 2 (2.062%)                | 2.021<br>(0.180-22.664) | 0.561 | 14:02         | 0.878<br>(0.533-1.448)  | 0.611 | 0.1             |
| 1.000<br>(0.057-17.411) | 1         | -                            | -                         | -                       | -     | 14:03         | 0.830<br>(0.250-2.756)  | 0.761 | 0.638           |
| -                       | 0.14<br>5 | 2 (2.062%)                   | 2 (2.062%)                | 1.000<br>(0.138-7.246)  | 1     | 15:02         | 0.936<br>(0.565-1.550)  | 0.797 | 0.558           |
| -                       | -         | -                            | -                         | -                       | -     | 15:05         | 3.000<br>(0.313-28.766) | 0.317 | -               |
| -                       | -         | 4 (4.124%)                   | 3 (3.093%)                | 0.742<br>(0.162-3.407)  | 0.7   | 16:01         | 0.394<br>(0.179-0.867)  | 0.017 | 0.351           |
| -                       | -         | 1 (1.031%)                   | 1 (1.031%)                | 1.000<br>(0.062-16.219) | 1     | 16:02         | 1.337<br>(0.297-6.020)  | 0.704 | 0.809           |
| -                       | -         | -                            | -                         | -                       | -     | 17:01         | 1.506<br>(0.249-9.094)  | 0.653 | 1               |

nszel test. CI = confidence interval. Upper and lower limits represent 95 intervals. Cases and controls are matched for country, ethnicity and



**Table S11. Stepwise analysis of HLA-DRB1, HLA-DQA1 and HLA-DQB1 alleles in ImmunoChip sample.**

| CHR | Allele     | OR     | P         |
|-----|------------|--------|-----------|
| 6   | DRB1*15:01 | 23.26  | 0         |
| 6   | DRB1*01:01 | 0.3632 | 1.56E-12  |
| 6   | DRB1*13:01 | 0.2146 | 1.78E-11  |
| 6   | DRB1*07:01 | 0.6726 | 2.55E-05  |
| 6   | DRB1*16:01 | 1.822  | 0.0004445 |
| 6   | DRB1*11:01 | 1.413  | 0.000246  |
| 6   | DRB1*11:04 | 1.637  | 0.005235  |
| 6   | DRB1*15:02 | 0.2302 | 0.01478   |
| 6   | DRB1*08:02 | 15.65  | 0.01725   |
| 6   | DRB1*04:07 | 1.792  | 0.01959   |
| 6   | DRB1*08:01 | 1.517  | 0.01623   |

| CHR | Allele     | OR     | P        |
|-----|------------|--------|----------|
| 6   | DQA1*01:02 | 10.41  | 0        |
| 6   | DQA1*05:05 | 1.718  | 1.31E-13 |
| 6   | DQA1*01:03 | 0.2888 | 1.23E-09 |
| 6   | DQA1*01:01 | 0.4117 | 1.10E-11 |
| 6   | DQA1*03:03 | 1.435  | 0.000721 |
| 6   | DQA1*04:01 | 1.645  | 0.001555 |
| 6   | DQA1*03:01 | 1.345  | 0.005048 |
| 6   | DQA1*05:09 | 5.118  | 0.02143  |

| CHR | Allele     | OR     | P        |
|-----|------------|--------|----------|
| 6   | DQB1*06:02 | 26.62  | 0        |
| 6   | DQB1*03:01 | 1.697  | 2.08E-14 |
| 6   | DQB1*05:01 | 0.46   | 7.57E-10 |
| 6   | DQB1*06:03 | 0.2735 | 1.28E-09 |
| 6   | DQB1*05:02 | 2.209  | 1.08E-06 |
| 6   | DQB1*02:02 | 0.7384 | 0.007824 |
| 6   | DQB1*06:01 | 0.3006 | 0.0233   |
| 6   | DQB1*04:02 | 1.423  | 0.03455  |
| 6   | DQB1*06:04 | 1.371  | 0.03494  |
| 6   | DQB1*03:02 | 1.279  | 0.0377   |

Stepwise analysis of HLA-DRB1, HLA-DQA1 and HLA-DQB1 alleles in ImmunoChip sample. HLA-DQB1\*06:02 homozygous individuals removed from analysis.

**Table S12. Stepwise analysis of HLA-DRB1, HLA-DQA1 and HLA-DQB1 alleles in Chinese sample.**

| CHR | HLA-allele | OR      | P         |
|-----|------------|---------|-----------|
| 6   | DRB1*15:01 | 7.908   | 3.13E-250 |
| 6   | DRB1*08:03 | 0.3865  | 0.0006992 |
| 6   | DRB1*13:01 | 0.2684  | 0.002199  |
| 6   | DRB1*12:02 | 1.555   | 0.00445   |
| 6   | DRB1*14:03 | 0.07686 | 0.01583   |

| CHR | HLA-allele | OR     | P         |
|-----|------------|--------|-----------|
| 6   | DQB1*06:02 | 9.293  | 2.95E-265 |
| 6   | DQB1*06:03 | 0.2581 | 0.002661  |
| 6   | DQB1*03:01 | 1.261  | 0.04883   |
| 6   | DQB1*03:02 | 1.631  | 0.03339   |
| 6   | DQB1*05:02 | 1.603  | 0.03201   |

| CHR | HLA-allele | OR     | P         |
|-----|------------|--------|-----------|
| 6   | DQA1*01:02 | 5.89   | 1.47E-205 |
| 6   | DQA1*01:03 | 0.41   | 3.71E-07  |
| 6   | DQA1*06:01 | 1.55   | 0.001138  |
| 6   | DQA1*05:05 | 1.49   | 0.001291  |
| 6   | DQA1*05:03 | 0.2011 | 0.01092   |
| 6   | DQA1*01:01 | 0.5389 | 0.03131   |

Stepwise analysis of HLA-DRB1, HLA-DQA1 and HLA-DQB1 alleles in Chinese sample. HLA-DQB1\*06:02 homozygous individuals removed from analysis.

Table S13. Association of HLA alleles with narcolepsy in the White sample after conditioning for all significant HLA-DRB1, HLA-DQA1 and HLA-DQB1 loci.

| CHR | HLA allele | OR        | SE      | CI lower | CI upper | P         |
|-----|------------|-----------|---------|----------|----------|-----------|
| 6   | A*01:01    | 0.8487    | 0.07669 | 0.7303   | 0.9864   | 0.03247   |
| 6   | A*02:01    | 0.9863    | 0.05457 | 0.8862   | 1.098    | 0.7998    |
| 6   | A*02:02    | 2.499     | 0.6819  | 0.6567   | 9.512    | 0.1792    |
| 6   | A*02:05    | 1.385     | 0.258   | 0.8354   | 2.297    | 0.2066    |
| 6   | A*02:06    | 0.7225    | 1.044   | 0.09339  | 5.59     | 0.7555    |
| 6   | A*03:01    | 0.9203    | 0.06446 | 0.8111   | 1.044    | 0.1975    |
| 6   | A*11:01    | 1.278     | 0.1009  | 1.048    | 1.557    | 0.01519   |
| 6   | A*23:01    | 0.9631    | 0.191   | 0.6624   | 1.4      | 0.8441    |
| 6   | A*24:02    | 1.079     | 0.08268 | 0.9178   | 1.269    | 0.3565    |
| 6   | A*25:01    | 1.481     | 0.1286  | 1.151    | 1.905    | 0.002266  |
| 6   | A*26:01    | 1.035     | 0.1613  | 0.7548   | 1.421    | 0.8289    |
| 6   | A*29:01    | 2.384     | 0.3784  | 1.136    | 5.006    | 0.02164   |
| 6   | A*29:02    | 0.6403    | 0.1601  | 0.4679   | 0.8763   | 0.005353  |
| 6   | A*30:01    | 0.9455    | 0.2355  | 0.596    | 1.5      | 0.812     |
| 6   | A*30:02    | 1.275     | 0.2514  | 0.7791   | 2.088    | 0.3334    |
| 6   | A*30:04    | 0.7842    | 0.7877  | 0.1675   | 3.672    | 0.7576    |
| 6   | A*31:01    | 1.191     | 0.1549  | 0.8791   | 1.613    | 0.2594    |
| 6   | A*32:01    | 0.8661    | 0.1361  | 0.6633   | 1.131    | 0.2909    |
| 6   | A*33:01    | 1.492     | 0.3271  | 0.786    | 2.833    | 0.221     |
| 6   | A*33:03    | 0.6979    | 0.547   | 0.2389   | 2.039    | 0.5109    |
| 6   | A*66:01    | 0.7431    | 0.5094  | 0.2738   | 2.017    | 0.56      |
| 6   | A*68:01    | 1.065     | 0.1489  | 0.7957   | 1.426    | 0.6711    |
| 6   | A*68:02    | 1.125     | 0.3182  | 0.6032   | 2.099    | 0.7106    |
| 6   | A*69:01    | 0.6592    | 0.6643  | 0.1793   | 2.424    | 0.5304    |
| 6   | B*07:02    | 0.781     | 0.06409 | 0.6888   | 0.8855   | 0.0001147 |
| 6   | B*07:05    | 0.7957    | 0.4444  | 0.333    | 1.901    | 0.6072    |
| 6   | B*08:01    | 0.9794    | 0.1074  | 0.7935   | 1.209    | 0.8461    |
| 6   | B*13:02    | 0.8576    | 0.1935  | 0.5868   | 1.253    | 0.4272    |
| 6   | B*14:01    | 1.243     | 0.2695  | 0.7329   | 2.108    | 0.4198    |
| 6   | B*14:02    | 1.208     | 0.195   | 0.8244   | 1.77     | 0.3322    |
| 6   | B*15:01    | 0.7796    | 0.129   | 0.6054   | 1.004    | 0.05365   |
| 6   | B*15:03    | 0.966     | 1.045   | 0.1245   | 7.494    | 0.9736    |
| 6   | B*15:16    | 3.147     | 0.774   | 0.6903   | 14.35    | 0.1385    |
| 6   | B*15:17    | 0.4931    | 0.5064  | 0.1828   | 1.33     | 0.1626    |
| 6   | B*18:01    | 1.428     | 0.09475 | 1.186    | 1.72     | 0.0001686 |
| 6   | B*27:05    | 1.088     | 0.1515  | 0.8085   | 1.464    | 0.5781    |
| 6   | B*35:01    | 1.484     | 0.1212  | 1.17     | 1.882    | 0.001122  |
| 6   | B*35:02    | 1.207     | 0.2384  | 0.7562   | 1.925    | 0.4309    |
| 6   | B*35:03    | 1.952     | 0.1712  | 1.395    | 2.73     | 9.377e-05 |
| 6   | B*35:08    | 0.8022    | 0.3698  | 0.3886   | 1.656    | 0.5513    |
| 6   | B*37:01    | 0.7761    | 0.2241  | 0.5002   | 1.204    | 0.2582    |
| 6   | B*38:01    | 0.7926    | 0.2214  | 0.5136   | 1.223    | 0.2939    |
| 6   | B*39:01    | 1.293     | 0.2143  | 0.8494   | 1.967    | 0.2309    |
| 6   | B*39:06    | 0.3791    | 0.4762  | 0.1491   | 0.964    | 0.04165   |
| 6   | B*40:01    | 0.3898    | 0.5617  | 0.1296   | 1.172    | 0.09349   |
| 6   | B*40:02    | 0.7336    | 0.4271  | 0.3176   | 1.694    | 0.4682    |
| 6   | B*41:01    | 3.462     | 0.8505  | 0.6537   | 18.33    | 0.1443    |
| 6   | B*44:02    | 0.9016    | 0.09695 | 0.7456   | 1.09     | 0.2853    |
| 6   | B*44:03    | 0.7247    | 0.1498  | 0.5403   | 0.9721   | 0.03163   |
| 6   | B*49:01    | 0.9065    | 0.2086  | 0.6023   | 1.364    | 0.638     |
| 6   | B*50:01    | 1.924     | 0.2316  | 1.222    | 3.029    | 0.00473   |
| 6   | B*51:01    | 1.553     | 0.1016  | 1.273    | 1.896    | 1.449e-05 |
| 6   | B*52:01    | 1.868e-06 | 426.1   | 0        | inf      | 0.9753    |
| 6   | B*55:01    | 0.8691    | 0.1977  | 0.59     | 1.28     | 0.4778    |
| 6   | B*57:01    | 0.7114    | 0.7972  | 0.1491   | 3.394    | 0.6692    |
| 6   | C*01:02    | 1.554     | 0.1461  | 1.167    | 2.069    | 0.002546  |
| 6   | C*02:02    | 1.084     | 0.1233  | 0.8511   | 1.38     | 0.5145    |
| 6   | C*02:10    | 0.3061    | 1.667   | 0.01166  | 8.037    | 0.4777    |
| 6   | C*03:02    | 0.6249    | 0.7194  | 0.1526   | 2.56     | 0.5135    |
| 6   | C*03:03    | 0.7101    | 0.1318  | 0.5485   | 0.9193   | 0.009368  |
| 6   | C*03:04    | 0.7307    | 0.1139  | 0.5844   | 0.9135   | 0.005891  |
| 6   | C*04:01    | 1.427     | 0.08721 | 1.203    | 1.693    | 4.517e-05 |
| 6   | C*05:01    | 0.8469    | 0.09813 | 0.6988   | 1.027    | 0.09048   |
| 6   | C*06:02    | 0.92      | 0.1015  | 0.754    | 1.122    | 0.4111    |
| 6   | C*07:01    | 0.9696    | 0.08082 | 0.8275   | 1.136    | 0.7024    |
| 6   | C*07:02    | 0.8166    | 0.06283 | 0.722    | 0.9237   | 0.001266  |
| 6   | C*07:04    | 1.099     | 0.2042  | 0.7368   | 1.64     | 0.6427    |
| 6   | C*08:02    | 1.243     | 0.1595  | 0.9094   | 1.7      | 0.1723    |

Table S13. continued

|   |             |        |         |         |        |           |
|---|-------------|--------|---------|---------|--------|-----------|
| 6 | C*08:03     | 19.7   | 2.488   | 0.1501  | 2585   | 0.231     |
| 6 | C*12:02     | 2.266  | 0.4131  | 1.009   | 5.093  | 0.0476    |
| 6 | C*12:03     | 1.461  | 0.09512 | 1.213   | 1.76   | 6.731e-05 |
| 6 | C*14:02     | 1.481  | 0.2119  | 0.9774  | 2.243  | 0.06401   |
| 6 | C*14:03     | 3.799  | 1.419   | 0.2354  | 61.3   | 0.3469    |
| 6 | C*15:02     | 1.313  | 0.1542  | 0.9704  | 1.776  | 0.07751   |
| 6 | C*15:04     | 5.276  | 1.679   | 0.1964  | 141.7  | 0.3219    |
| 6 | C*15:05     | 0.9966 | 0.4031  | 0.4523  | 2.196  | 0.9932    |
| 6 | C*16:01     | 0.6468 | 0.1769  | 0.4573  | 0.9149 | 0.0138    |
| 6 | C*16:02     | 1.36   | 0.3539  | 0.6797  | 2.721  | 0.3849    |
| 6 | C*16:04     | 1.094  | 0.5987  | 0.3384  | 3.537  | 0.8805    |
| 6 | C*17:01     | 0.9211 | 0.2989  | 0.5128  | 1.655  | 0.7834    |
| 6 | DPA1*01:03  | 1.116  | 0.06299 | 0.9864  | 1.263  | 0.08129   |
| 6 | DPA1*02:01  | 1.145  | 0.06444 | 1.009   | 1.299  | 0.03606   |
| 6 | DPA1*02:02  | 0.7973 | 0.2273  | 0.5107  | 1.245  | 0.3188    |
| 6 | DPB1*01:01  | 0.9922 | 0.1365  | 0.7594  | 1.296  | 0.9543    |
| 6 | DPB1*02:01  | 1.386  | 0.07428 | 1.198   | 1.603  | 1.137e-05 |
| 6 | DPB1*02:02  | 1.168  | 0.3179  | 0.6265  | 2.178  | 0.6248    |
| 6 | DPB1*03:01  | 0.9592 | 0.08587 | 0.8106  | 1.135  | 0.6275    |
| 6 | DPB1*04:01  | 1.053  | 0.05186 | 0.9513  | 1.166  | 0.3182    |
| 6 | DPB1*04:02  | 0.4703 | 0.1051  | 0.3827  | 0.5779 | 7.155e-13 |
| 6 | DPB1*05:01  | 1.428  | 0.1424  | 1.08    | 1.888  | 0.01231   |
| 6 | DPB1*06:02  | 0.5576 | 1.124   | 0.06155 | 5.051  | 0.6034    |
| 6 | DPB1*09:01  | 0.9128 | 0.3065  | 0.5006  | 1.664  | 0.7659    |
| 6 | DPB1*10:01  | 0.6425 | 0.2414  | 0.4003  | 1.031  | 0.06686   |
| 6 | DPB1*104:01 | 0.9423 | 0.223   | 0.6086  | 1.459  | 0.7898    |
| 6 | DPB1*11:01  | 1.013  | 0.2197  | 0.6587  | 1.559  | 0.9519    |
| 6 | DPB1*13:01  | 0.844  | 0.22    | 0.5484  | 1.299  | 0.4405    |
| 6 | DPB1*14:01  | 1.104  | 0.2143  | 0.7254  | 1.68   | 0.6441    |
| 6 | DPB1*15:01  | 1.46   | 0.2902  | 0.8264  | 2.578  | 0.1926    |
| 6 | DPB1*16:01  | 1.059  | 0.3316  | 0.5531  | 2.029  | 0.8618    |
| 6 | DPB1*17:01  | 1.282  | 0.2466  | 0.7905  | 2.078  | 0.3141    |
| 6 | DPB1*19:01  | 0.5048 | 0.4355  | 0.215   | 1.185  | 0.1165    |
| 6 | DQA1*01:04  | 0.9095 | 0.217   | 0.5944  | 1.392  | 0.662     |
| 6 | DQA1*01:05  | 0.3269 | 0.8942  | 0.05666 | 1.886  | 0.2112    |
| 6 | DQA1*02:01  | 1.435  | 0.8456  | 0.2735  | 7.526  | 0.6695    |
| 6 | DQA1*03:02  | 0.6735 | 0.3958  | 0.31    | 1.463  | 0.318     |
| 6 | DQA1*05:01  | 1.226  | 0.1914  | 0.8427  | 1.785  | 0.2864    |
| 6 | DQA1*05:03  | 1.153  | 1.006   | 0.1604  | 8.284  | 0.8876    |
| 6 | DQA1*06:01  | 0.7245 | 1.19    | 0.07027 | 7.469  | 0.7866    |
| 6 | DQB1*02:01  | 1.246  | 0.1915  | 0.8558  | 1.813  | 0.2514    |
| 6 | DQB1*03:03  | 0.7586 | 0.3317  | 0.396   | 1.453  | 0.4049    |
| 6 | DQB1*03:04  | 0.4021 | 1.283   | 0.03255 | 4.967  | 0.4775    |
| 6 | DQB1*05:03  | 0.8861 | 0.2171  | 0.579   | 1.356  | 0.5775    |
| 6 | DQB1*06:09  | 1.169  | 0.8045  | 0.2415  | 5.656  | 0.8463    |
| 6 | DRB1*01:02  | 1.437  | 0.6393  | 0.4106  | 5.032  | 0.5704    |
| 6 | DRB1*01:03  | 0.2797 | 0.7546  | 0.06373 | 1.227  | 0.09134   |
| 6 | DRB1*03:01  | 1.215  | 0.1805  | 0.8529  | 1.731  | 0.2808    |
| 6 | DRB1*04:01  | 1.035  | 0.1712  | 0.74    | 1.448  | 0.8402    |
| 6 | DRB1*04:02  | 1.344  | 0.3161  | 0.7231  | 2.496  | 0.3502    |
| 6 | DRB1*04:03  | 1.601  | 0.5086  | 0.5908  | 4.337  | 0.3549    |
| 6 | DRB1*04:04  | 0.8316 | 0.1951  | 0.5673  | 1.219  | 0.3445    |
| 6 | DRB1*04:05  | 1.101  | 0.5146  | 0.4015  | 3.018  | 0.852     |
| 6 | DRB1*04:06  | 1.654  | 1.197   | 0.1585  | 17.26  | 0.6741    |
| 6 | DRB1*04:08  | 0.8774 | 0.5994  | 0.271   | 2.841  | 0.8273    |
| 6 | DRB1*08:03  | 0.7012 | 1.182   | 0.06919 | 7.107  | 0.7639    |
| 6 | DRB1*08:04  | 2.035  | 0.7762  | 0.4445  | 9.319  | 0.3599    |
| 6 | DRB1*09:01  | 0.6664 | 0.3951  | 0.3072  | 1.446  | 0.3043    |
| 6 | DRB1*10:01  | 0.2695 | 0.8206  | 0.05397 | 1.346  | 0.1101    |
| 6 | DRB1*11:02  | 0.5131 | 0.7789  | 0.1115  | 2.362  | 0.3916    |
| 6 | DRB1*11:03  | 2.656  | 0.6742  | 0.7084  | 9.956  | 0.1474    |
| 6 | DRB1*12:01  | 1.249  | 0.2886  | 0.7096  | 2.199  | 0.4406    |
| 6 | DRB1*13:02  | 0.686  | 0.6094  | 0.2078  | 2.265  | 0.5362    |
| 6 | DRB1*13:03  | 1.024  | 0.2999  | 0.5691  | 1.844  | 0.9359    |
| 6 | DRB1*14:01  | 0.8805 | 0.2163  | 0.5763  | 1.345  | 0.556     |
| 6 | DRB1*16:02  | 1.441  | 0.985   | 0.209   | 9.936  | 0.7106    |

Association of HLA alleles with narcolepsy in the White sample after conditioning for all significant HLA-DRB1, HLA-DQA1 and HLA-DQB1 loci. HLA-DQB1\*06:02 homozygous individuals are removed from analysis.

Table S14. Association of HLA alleles with narcolepsy in the Chinese sample after conditioning for all significant HLA-DRB1, HLA-DQA1, HLA-DQB1 loci and SNPs associating with before vs. after 2009

| HLA allele | OR     | SE     | Ci lower | Ci upper | P        |
|------------|--------|--------|----------|----------|----------|
| A*01:01    | 0.9357 | 0.2274 | 0.5992   | 1.461    | 0.7703   |
| A*02:01    | 0.7552 | 0.1203 | 0.5965   | 0.9559   | 0.01957  |
| A*02:03    | 2.875  | 1.006  | 0.4003   | 20.65    | 0.2938   |
| A*02:05    | 0.4275 | 0.7595 | 0.09647  | 1.894    | 0.2632   |
| A*02:06    | 1.126  | 0.1568 | 0.8281   | 1.531    | 0.4495   |
| A*02:07    | 1.665  | 0.2234 | 1.074    | 2.579    | 0.02252  |
| A*03:01    | 0.7509 | 0.2085 | 0.499    | 1.13     | 0.1695   |
| A*03:02    | 0.18   | 0.8845 | 0.0318   | 1.019    | 0.05258  |
| A*11:01    | 1.387  | 0.1235 | 1.089    | 1.767    | 0.008133 |
| A*11:02    | 0.7814 | 0.7741 | 0.1714   | 3.563    | 0.75     |
| A*23:01    | 0.6431 | 1.105  | 0.07376  | 5.607    | 0.6894   |
| A*24:02    | 1.079  | 0.113  | 0.8644   | 1.346    | 0.5022   |
| A*24:03    | 0.4002 | 1.009  | 0.0554   | 2.891    | 0.364    |
| A*26:01    | 0.8442 | 0.252  | 0.5151   | 1.383    | 0.5015   |
| A*29:01    | 1.059  | 0.515  | 0.3859   | 2.906    | 0.9113   |
| A*30:01    | 0.8888 | 0.2143 | 0.584    | 1.353    | 0.5822   |
| A*30:02    | 0.1445 | 1.631  | 0.005909 | 3.535    | 0.2357   |
| A*30:04    | 6.977  | 3.293  | 0.01099  | 4430     | 0.5552   |
| A*31:01    | 0.8589 | 0.2193 | 0.5588   | 1.32     | 0.4879   |
| A*32:01    | 0.9441 | 0.43   | 0.4064   | 2.193    | 0.8935   |
| A*33:01    | 1.611  | 1.123  | 0.1782   | 14.56    | 0.6713   |
| A*33:03    | 0.8693 | 0.2337 | 0.5498   | 1.374    | 0.5489   |
| A*34:01    | 0.1508 | 1.544  | 0.007313 | 3.111    | 0.2206   |
| A*68:01    | 0.8308 | 0.4291 | 0.3583   | 1.926    | 0.6658   |
| B*07:02    | 0.8116 | 0.1924 | 0.5566   | 1.183    | 0.2781   |
| B*07:05    | 3.56   | 0.7907 | 0.7557   | 16.77    | 0.1083   |
| B*08:01    | 0.6706 | 0.5099 | 0.2469   | 1.821    | 0.4331   |
| B*13:01    | 0.7602 | 0.252  | 0.4639   | 1.246    | 0.2766   |
| B*13:02    | 0.9691 | 0.2297 | 0.6179   | 1.52     | 0.8913   |
| B*14:02    | 2.559  | 1.065  | 0.3173   | 20.64    | 0.3777   |
| B*15:01    | 1.1    | 0.161  | 0.8022   | 1.508    | 0.5543   |
| B*15:02    | 1.095  | 0.3608 | 0.5397   | 2.22     | 0.8021   |
| B*15:07    | 0.7998 | 1.233  | 0.07129  | 8.973    | 0.8563   |
| B*15:11    | 1.02   | 0.2975 | 0.5694   | 1.828    | 0.9463   |
| B*15:17    | 29.6   | 2.091  | 0.4916   | 1783     | 0.1052   |
| B*15:18    | 0.9739 | 0.2685 | 0.5754   | 1.648    | 0.9216   |
| B*15:25    | 3.342  | 2.112  | 0.0532   | 209.9    | 0.5679   |
| B*15:35    | 1.964  | 1.074  | 0.2393   | 16.12    | 0.5297   |
| B*18:01    | 0.4779 | 0.4595 | 0.1942   | 1.176    | 0.1081   |
| B*27:04    | 0.8578 | 0.5919 | 0.2689   | 2.737    | 0.7956   |
| B*27:05    | 0.4677 | 0.5358 | 0.1637   | 1.337    | 0.156    |
| B*35:01    | 0.8922 | 0.1775 | 0.6301   | 1.263    | 0.5206   |
| B*35:02    | 0.6874 | 0.9295 | 0.1112   | 4.25     | 0.6868   |
| B*35:03    | 1.619  | 0.5563 | 0.5443   | 4.818    | 0.3861   |
| B*35:05    | 3.632  | 2.854  | 0.01352  | 975.6    | 0.6513   |
| B*35:08    | 4.818  | 3.304  | 0.007427 | 3126     | 0.6341   |
| B*37:01    | 1.195  | 0.3668 | 0.5824   | 2.453    | 0.6268   |
| B*38:01    | 0.5854 | 0.4657 | 0.235    | 1.458    | 0.2502   |
| B*38:02    | 0.7874 | 0.3433 | 0.4018   | 1.543    | 0.4862   |
| B*39:01    | 0.5454 | 0.4077 | 0.2453   | 1.213    | 0.1371   |
| B*40:01    | 1.094  | 0.1659 | 0.7905   | 1.515    | 0.5871   |
| B*40:02    | 0.6742 | 0.2666 | 0.3998   | 1.137    | 0.1392   |
| B*40:06    | 1.505  | 0.2085 | 1        | 2.265    | 0.04978  |
| B*41:01    | 0.4234 | 1.004  | 0.05918  | 3.03     | 0.3921   |
| B*44:02    | 0.7239 | 0.4758 | 0.2849   | 1.839    | 0.4971   |
| B*44:03    | 0.7603 | 0.3559 | 0.3784   | 1.527    | 0.4412   |
| B*45:01    | 12.29  | 4.18   | 0.003404 | 4.44E+04 | 0.5483   |
| B*46:01    | 1.125  | 0.1914 | 0.7731   | 1.637    | 0.538    |
| B*48:01    | 0.9727 | 0.2659 | 0.5776   | 1.638    | 0.9172   |
| B*49:01    | 1.205  | 0.9184 | 0.1991   | 7.288    | 0.8393   |
| B*50:01    | 1.678  | 0.5467 | 0.5748   | 4.901    | 0.3435   |
| B*51:01    | 1.385  | 0.1912 | 0.952    | 2.015    | 0.08865  |
| B*51:02    | 1.007  | 0.3872 | 0.4714   | 2.151    | 0.9855   |
| B*52:01    | 1.235  | 0.3347 | 0.6408   | 2.38     | 0.5285   |
| B*54:01    | 1.164  | 0.2466 | 0.7177   | 1.887    | 0.5384   |
| B*55:02    | 1.621  | 0.4477 | 0.6739   | 3.898    | 0.2808   |
| B*56:01    | 1.071  | 1.252  | 0.09201  | 12.46    | 0.9566   |
| B*57:01    | 0.4325 | 0.4932 | 0.1645   | 1.137    | 0.08927  |
| B*58:01    | 0.9431 | 0.3065 | 0.5172   | 1.72     | 0.8485   |
| B*67:01    | 0.384  | 0.3336 | 0.1997   | 0.7384   | 0.004118 |
| B*81:01    | 3.125  | 0.7869 | 0.6685   | 14.61    | 0.1476   |
| C*01:02    | 1.158  | 0.1475 | 0.8669   | 1.546    | 0.3213   |
| C*02:02    | 0.7002 | 0.57   | 0.2291   | 2.14     | 0.5318   |
| C*03:02    | 0.9428 | 0.3065 | 0.5171   | 1.719    | 0.8477   |
| C*03:03    | 1.025  | 0.1339 | 0.7883   | 1.333    | 0.8541   |
| C*03:04    | 0.7819 | 0.1558 | 0.5762   | 1.061    | 0.1143   |
| C*04:01    | 0.957  | 0.2033 | 0.6425   | 1.425    | 0.8289   |
| C*04:03    | 0.8573 | 0.7548 | 0.1953   | 3.763    | 0.8383   |
| C*05:01    | 0.6749 | 0.4234 | 0.2944   | 1.548    | 0.3531   |

Table S14. continued

|             |        |         |         |          |           |
|-------------|--------|---------|---------|----------|-----------|
| C*06:02     | 0.9116 | 0.175   | 0.6469  | 1.285    | 0.5967    |
| C*07:01     | 2.514  | 0.5229  | 0.902   | 7.005    | 0.07795   |
| C*07:02     | 0.8241 | 0.1263  | 0.6435  | 1.056    | 0.1256    |
| C*07:04     | 0.7121 | 0.4004  | 0.3249  | 1.561    | 0.3964    |
| C*08:01     | 1.251  | 0.139   | 0.953   | 1.643    | 0.1065    |
| C*08:02     | 2.526  | 1.055   | 0.3196  | 19.97    | 0.3797    |
| C*08:03     | 19.85  | 3.559   | 0.01856 | 2.12E+04 | 0.4011    |
| C*12:02     | 0.9168 | 0.3273  | 0.4827  | 1.741    | 0.7908    |
| C*12:03     | 0.4683 | 0.3382  | 0.2414  | 0.9086   | 0.02487   |
| C*14:02     | 1.388  | 0.2128  | 0.9148  | 2.106    | 0.1232    |
| C*14:03     | 0.4978 | 0.554   | 0.1681  | 1.475    | 0.208     |
| C*15:02     | 1.279  | 0.2147  | 0.8395  | 1.948    | 0.2523    |
| C*15:05     | 2.831  | 0.8527  | 0.5321  | 15.06    | 0.2224    |
| C*16:02     | 6.374  | 2.074   | 0.1094  | 371.5    | 0.3719    |
| C*17:01     | 0.4529 | 1.418   | 0.02812 | 7.294    | 0.5764    |
| DPA1*01:03  | 0.681  | 0.1011  | 0.5586  | 0.8302   | 0.0001446 |
| DPA1*02:01  | 0.7567 | 0.195   | 0.5163  | 1.109    | 0.153     |
| DPA1*02:02  | 0.6519 | 0.09862 | 0.5374  | 0.7909   | 1.44E-05  |
| DPA1*04:01  | 5.441  | 2.858   | 0.02008 | 1475     | 0.5534    |
| DPB1-01:01  | 5.389  | 1.852   | 0.143   | 203.1    | 0.363     |
| DPB1-02:01  | 1.139  | 0.102   | 0.9321  | 1.391    | 0.2037    |
| DPB1-02:02  | 1.029  | 0.2533  | 0.6263  | 1.69     | 0.9102    |
| DPB1-03:01  | 0.6982 | 0.2174  | 0.4559  | 1.069    | 0.09837   |
| DPB1-04:01  | 0.7761 | 0.1494  | 0.5791  | 1.04     | 0.08973   |
| DPB1-04:02  | 0.379  | 0.2251  | 0.2438  | 0.5892   | 1.64E-05  |
| DPB1-05:01  | 1.353  | 0.09713 | 1.118   | 1.637    | 0.001857  |
| DPB1-09:01  | 0.7403 | 0.485   | 0.2861  | 1.915    | 0.5352    |
| DPB1-09:02  | 1.211  | 0.4379  | 0.5133  | 2.857    | 0.6621    |
| DPB1-104:01 | 2.326  | 0.8916  | 0.4051  | 13.35    | 0.3439    |
| DPB1-13:01  | 0.9734 | 0.3351  | 0.5047  | 1.877    | 0.9359    |
| DPB1-14:01  | 0.7021 | 0.2821  | 0.4039  | 1.221    | 0.2101    |
| DPB1-17:01  | 0.7955 | 0.2693  | 0.4693  | 1.349    | 0.3956    |
| DPB1-19:01  | 0.4859 | 0.6379  | 0.1392  | 1.697    | 0.2579    |
| DPB1-26:01  | 1.123  | 1.228   | 0.1011  | 12.48    | 0.9247    |
| DQA1*01:04  | 2.693  | 0.4816  | 1.048   | 6.92     | 0.03971   |
| DQA1*01:05  | 1.045  | 0.5784  | 0.3363  | 3.246    | 0.9398    |
| DQA1*02:01  | 1.05   | 0.2263  | 0.674   | 1.637    | 0.8285    |
| DQA1*03:01  | 3.975  | 1.769   | 0.124   | 127.5    | 0.4354    |
| DQA1*03:02  | 0.6977 | 0.2209  | 0.4525  | 1.076    | 0.1032    |
| DQA1*03:03  | 1.143  | 0.2753  | 0.6661  | 1.96     | 0.6282    |
| DQA1*04:01  | 0.8414 | 0.6118  | 0.2536  | 2.791    | 0.7777    |
| DQA1*05:01  | 0.8577 | 0.5556  | 0.2887  | 2.549    | 0.7824    |
| DQA1*05:08  | 1.329  | 0.7483  | 0.3066  | 5.761    | 0.7037    |
| DQB1*02:01  | 0.9369 | 0.6681  | 0.2529  | 3.47     | 0.9222    |
| DQB1*02:02  | 1.173  | 0.2344  | 0.7407  | 1.857    | 0.4968    |
| DQB1*03:03  | 0.6456 | 0.2191  | 0.4202  | 0.9918   | 0.04577   |
| DQB1*04:01  | 1.347  | 0.311   | 0.7319  | 2.477    | 0.3387    |
| DQB1*04:02  | 0.7455 | 0.5565  | 0.2505  | 2.219    | 0.5976    |
| DQB1*05:01  | 1.331  | 0.5469  | 0.4557  | 3.887    | 0.6012    |
| DQB1*05:03  | 1.986  | 0.508   | 0.7338  | 5.374    | 0.1768    |
| DQB1*06:01  | 0.4377 | 0.7295  | 0.1048  | 1.829    | 0.2574    |
| DQB1*06:04  | 1.275  | 0.6092  | 0.3865  | 4.209    | 0.6897    |
| DQB1*06:09  | 1.596  | 0.6104  | 0.4825  | 5.28     | 0.4437    |
| DRB1*01:01  | 0.326  | 0.8846  | 0.05757 | 1.846    | 0.2051    |
| DRB1*01:02  | 11.69  | 1.722   | 0.3997  | 341.7    | 0.1535    |
| DRB1*03:01  | 0.7128 | 0.6531  | 0.1982  | 2.564    | 0.6042    |
| DRB1*04:01  | 0.8701 | 0.7143  | 0.2145  | 3.529    | 0.8455    |
| DRB1*04:02  | 0.3168 | 1.441   | 0.01882 | 5.333    | 0.4249    |
| DRB1*04:03  | 2.061  | 0.5346  | 0.723   | 5.877    | 0.176     |
| DRB1*04:05  | 1.257  | 0.3044  | 0.692   | 2.282    | 0.4529    |
| DRB1*04:06  | 0.8167 | 0.5448  | 0.2808  | 2.376    | 0.7101    |
| DRB1*04:10  | 0.4152 | 1.398   | 0.02683 | 6.427    | 0.5295    |
| DRB1*07:01  | 1.043  | 0.2259  | 0.67    | 1.624    | 0.8518    |
| DRB1*08:02  | 0.6625 | 0.5706  | 0.2165  | 2.027    | 0.4705    |
| DRB1*09:01  | 0.7271 | 0.2203  | 0.4722  | 1.12     | 0.1481    |
| DRB1*10:01  | 1.108  | 0.552   | 0.3754  | 3.268    | 0.8531    |
| DRB1*11:01  | 0.8148 | 0.3513  | 0.4092  | 1.622    | 0.5598    |
| DRB1*11:04  | 0.353  | 0.7235  | 0.08549 | 1.457    | 0.15      |
| DRB1*12:01  | 0.9808 | 0.3399  | 0.5039  | 1.909    | 0.9546    |
| DRB1*13:02  | 3.378  | 1.22    | 0.3091  | 36.92    | 0.3184    |
| DRB1*13:12  | 4.497  | 1.782   | 0.1369  | 147.7    | 0.3988    |
| DRB1*14:01  | 0.9879 | 0.5521  | 0.3348  | 2.915    | 0.9824    |
| DRB1*14:04  | 2.33   | 0.6677  | 0.6297  | 8.625    | 0.2051    |
| DRB1*14:05  | 2.546  | 0.6122  | 0.7671  | 8.453    | 0.1268    |
| DRB1*14:54  | 0.5249 | 0.9873  | 0.0758  | 3.635    | 0.5138    |
| DRB1*15:02  | 6.786  | 0.8794  | 1.211   | 38.04    | 0.02944   |
| DRB1*16:02  | 0.8912 | 0.6702  | 0.2396  | 3.315    | 0.8636    |

Association of HLA alleles with narcolepsy in the Chinese sample after conditioning for all significant HLA-DRB1, HLA-DQA1, HLA-DQB1 loci and SNPs associating with before vs. after 2009. HLA-DQB1\*06:02 homozygous individuals are removed from

Table S15. Association of HLA alleles with narcolepsy in the White sample after conditioning for all significant HLA-DRB1, HLA-DQA1, HLA-DQB1, HLA-DPA1 and HLA-DPB1 loci.

| HLA-allele | OR        | SE      | Ci lower | Ci upper | P         |
|------------|-----------|---------|----------|----------|-----------|
| A*01:01    | 0.8588    | 0.07712 | 0.7383   | 0.9989   | 0.04839   |
| A*02:01    | 0.9812    | 0.05525 | 0.8805   | 1.093    | 0.7307    |
| A*02:02    | 2.4       | 0.6769  | 0.6368   | 9.046    | 0.1959    |
| A*02:05    | 1.442     | 0.2594  | 0.8671   | 2.397    | 0.1585    |
| A*02:06    | 0.643     | 1.072   | 0.0787   | 5.254    | 0.6803    |
| A*03:01    | 0.9281    | 0.06509 | 0.817    | 1.054    | 0.2518    |
| A*11:01    | 1.282     | 0.1018  | 1.05     | 1.565    | 0.01459   |
| A*23:01    | 0.9239    | 0.1927  | 0.6333   | 1.348    | 0.6814    |
| A*24:02    | 1.067     | 0.08357 | 0.9059   | 1.257    | 0.4367    |
| A*25:01    | 1.499     | 0.1294  | 1.163    | 1.932    | 0.001749  |
| A*26:01    | 1.039     | 0.1626  | 0.7557   | 1.429    | 0.8125    |
| A*29:01    | 2.499     | 0.3776  | 1.192    | 5.239    | 0.0153    |
| A*29:02    | 0.6362    | 0.1608  | 0.4642   | 0.8719   | 0.004913  |
| A*30:01    | 0.936     | 0.2378  | 0.5873   | 1.492    | 0.7809    |
| A*30:02    | 1.248     | 0.2524  | 0.7609   | 2.047    | 0.3801    |
| A*30:04    | 0.609     | 0.8207  | 0.1219   | 3.042    | 0.5456    |
| A*31:01    | 1.226     | 0.1566  | 0.9023   | 1.667    | 0.1924    |
| A*32:01    | 0.8518    | 0.1371  | 0.6511   | 1.114    | 0.2421    |
| A*33:01    | 1.453     | 0.3287  | 0.7627   | 2.766    | 0.2561    |
| A*33:03    | 0.6343    | 0.5535  | 0.2144   | 1.877    | 0.4109    |
| A*66:01    | 0.7804    | 0.5094  | 0.2875   | 2.118    | 0.6264    |
| A*68:01    | 1.067     | 0.1495  | 0.7958   | 1.43     | 0.6659    |
| A*68:02    | 1.113     | 0.3226  | 0.5915   | 2.095    | 0.7394    |
| A*69:01    | 0.6637    | 0.6727  | 0.1776   | 2.48     | 0.5422    |
| B*07:02    | 0.7762    | 0.06455 | 0.684    | 0.8809   | 8.702e-05 |
| B*07:05    | 0.887     | 0.4443  | 0.3713   | 2.119    | 0.7872    |
| B*08:01    | 0.99      | 0.1079  | 0.8013   | 1.223    | 0.9262    |
| B*13:02    | 0.8609    | 0.1952  | 0.5872   | 1.262    | 0.4431    |
| B*14:01    | 1.283     | 0.2739  | 0.7499   | 2.195    | 0.3631    |
| B*14:02    | 1.092     | 0.1981  | 0.7403   | 1.609    | 0.6583    |
| B*15:01    | 0.7977    | 0.1293  | 0.6191   | 1.028    | 0.08047   |
| B*15:03    | 1.017     | 1.047   | 0.1308   | 7.907    | 0.9873    |
| B*15:16    | 3.496     | 0.7791  | 0.7593   | 16.1     | 0.1082    |
| B*15:17    | 0.5273    | 0.5127  | 0.193    | 1.44     | 0.2119    |
| B*18:01    | 1.455     | 0.09545 | 1.207    | 1.755    | 8.427e-05 |
| B*27:05    | 1.123     | 0.1533  | 0.8314   | 1.517    | 0.4496    |
| B*35:01    | 1.518     | 0.1219  | 1.195    | 1.927    | 0.0006199 |
| B*35:02    | 1.077     | 0.2433  | 0.6684   | 1.735    | 0.7608    |
| B*35:03    | 1.961     | 0.1732  | 1.397    | 2.754    | 0.0001006 |
| B*35:08    | 0.8243    | 0.3728  | 0.397    | 1.712    | 0.6042    |
| B*37:01    | 0.7532    | 0.2254  | 0.4842   | 1.171    | 0.2084    |
| B*38:01    | 0.7616    | 0.2239  | 0.4911   | 1.181    | 0.2239    |
| B*39:01    | 1.284     | 0.2161  | 0.8403   | 1.961    | 0.2482    |
| B*39:06    | 0.3702    | 0.4801  | 0.1445   | 0.9487   | 0.03849   |
| B*40:01    | 0.4157    | 0.5596  | 0.1388   | 1.245    | 0.1167    |
| B*40:02    | 0.7545    | 0.4333  | 0.3228   | 1.764    | 0.5157    |
| B*41:01    | 3.413     | 0.8661  | 0.6249   | 18.64    | 0.1564    |
| B*44:02    | 0.9083    | 0.0979  | 0.7497   | 1.1      | 0.3258    |
| B*44:03    | 0.7157    | 0.1509  | 0.5325   | 0.962    | 0.02662   |
| B*49:01    | 0.9046    | 0.2107  | 0.5986   | 1.367    | 0.6339    |
| B*50:01    | 1.863     | 0.2342  | 1.177    | 2.948    | 0.007926  |
| B*51:01    | 1.514     | 0.1028  | 1.238    | 1.852    | 5.445e-05 |
| B*52:01    | 1.674e-06 | 423.5   | 0        | inf      | 0.9749    |
| B*55:01    | 0.8815    | 0.1982  | 0.5978   | 1.3      | 0.5244    |
| B*57:01    | 0.7505    | 0.7977  | 0.1572   | 3.584    | 0.719     |
| C*01:02    | 1.514     | 0.1479  | 1.133    | 2.023    | 0.005044  |
| C*02:02    | 1.108     | 0.1245  | 0.8684   | 1.415    | 0.4083    |
| C*02:10    | 0.2976    | 1.644   | 0.01185  | 7.47     | 0.4611    |
| C*03:02    | 0.6124    | 0.7238  | 0.1482   | 2.53     | 0.498     |
| C*03:03    | 0.7294    | 0.1323  | 0.5628   | 0.9453   | 0.01709   |
| C*03:04    | 0.7316    | 0.115   | 0.584    | 0.9166   | 0.006576  |
| C*04:01    | 1.42      | 0.08808 | 1.195    | 1.687    | 6.892e-05 |
| C*05:01    | 0.861     | 0.09886 | 0.7094   | 1.045    | 0.1301    |
| C*06:02    | 0.9123    | 0.1024  | 0.7465   | 1.115    | 0.3699    |

Table S15. continued

|             |        |         |         |        |           |
|-------------|--------|---------|---------|--------|-----------|
| C*07:01     | 0.9927 | 0.08135 | 0.8464  | 1.164  | 0.9279    |
| C*07:02     | 0.814  | 0.0633  | 0.719   | 0.9215 | 0.00115   |
| C*07:04     | 1.087  | 0.207   | 0.7248  | 1.632  | 0.6856    |
| C*08:02     | 1.17   | 0.1621  | 0.8516  | 1.608  | 0.3325    |
| C*08:03     | 15.67  | 2.27    | 0.183   | 1342   | 0.2255    |
| C*12:02     | 2.006  | 0.4135  | 0.8921  | 4.512  | 0.09222   |
| C*12:03     | 1.461  | 0.09588 | 1.211   | 1.763  | 7.685e-05 |
| C*14:02     | 1.402  | 0.2149  | 0.9202  | 2.137  | 0.1157    |
| C*14:03     | 4.104  | 1.316   | 0.3112  | 54.12  | 0.2833    |
| C*15:02     | 1.278  | 0.156   | 0.9416  | 1.736  | 0.1154    |
| C*15:04     | 4.315  | 1.68    | 0.1602  | 116.2  | 0.3842    |
| C*15:05     | 1.074  | 0.402   | 0.4886  | 2.362  | 0.8587    |
| C*16:01     | 0.6542 | 0.1775  | 0.462   | 0.9263 | 0.01679   |
| C*16:02     | 1.342  | 0.3592  | 0.6639  | 2.714  | 0.4124    |
| C*16:04     | 0.9458 | 0.6036  | 0.2897  | 3.088  | 0.9265    |
| C*17:01     | 0.921  | 0.2995  | 0.512   | 1.656  | 0.7834    |
| DPB1-01:01  | 0.9963 | 0.1382  | 0.7599  | 1.306  | 0.9789    |
| DPB1-02:02  | 1.088  | 0.3192  | 0.582   | 2.034  | 0.7917    |
| DPB1-03:01  | 0.9458 | 0.08786 | 0.7962  | 1.124  | 0.5263    |
| DPB1-04:01  | 1.028  | 0.06597 | 0.9035  | 1.17   | 0.6738    |
| DPB1-06:02  | 0.5678 | 1.127   | 0.06231 | 5.174  | 0.6156    |
| DPB1-09:01  | 0.8961 | 0.3086  | 0.4894  | 1.641  | 0.7223    |
| DPB1-104:01 | 0.9295 | 0.2247  | 0.5984  | 1.444  | 0.745     |
| DPB1-11:01  | 0.9916 | 0.2209  | 0.6431  | 1.529  | 0.9695    |
| DPB1-13:01  | 0.8519 | 0.2216  | 0.5517  | 1.315  | 0.4696    |
| DPB1-14:01  | 1.084  | 0.2158  | 0.7103  | 1.655  | 0.708     |
| DPB1-15:01  | 1.408  | 0.2926  | 0.7934  | 2.498  | 0.2423    |
| DPB1-16:01  | 1.086  | 0.3321  | 0.5663  | 2.082  | 0.8043    |
| DPB1-17:01  | 1.276  | 0.2485  | 0.7837  | 2.076  | 0.3274    |
| DPB1-19:01  | 0.4897 | 0.4385  | 0.2073  | 1.157  | 0.1035    |
| DQA1*01:04  | 0.8648 | 0.2186  | 0.5634  | 1.327  | 0.5063    |
| DQA1*01:05  | 0.3363 | 0.9054  | 0.05702 | 1.983  | 0.2287    |
| DQA1*02:01  | 1.451  | 0.8242  | 0.2884  | 7.297  | 0.6517    |
| DQA1*03:02  | 0.7132 | 0.399   | 0.3263  | 1.559  | 0.3969    |
| DQA1*05:01  | 1.261  | 0.1929  | 0.8638  | 1.84   | 0.2298    |
| DQA1*05:03  | 0.9721 | 1.009   | 0.1345  | 7.027  | 0.9776    |
| DQA1*05:09  | 0      | 2048    | 0       | inf    | 0.3233    |
| DQA1*06:01  | 0.679  | 1.201   | 0.06451 | 7.147  | 0.7472    |
| DQB1*02:01  | 1.284  | 0.1931  | 0.8792  | 1.874  | 0.1959    |
| DQB1*03:03  | 0.7853 | 0.3336  | 0.4084  | 1.51   | 0.4689    |
| DQB1*03:04  | 0.4197 | 1.285   | 0.03382 | 5.209  | 0.4993    |
| DQB1*05:03  | 0.8453 | 0.2186  | 0.5507  | 1.297  | 0.4419    |
| DQB1*06:09  | 1.078  | 0.816   | 0.2179  | 5.337  | 0.9263    |
| DRB1*01:02  | 1.272  | 0.6389  | 0.3636  | 4.449  | 0.7067    |
| DRB1*01:03  | 0.3493 | 0.7556  | 0.07942 | 1.536  | 0.1639    |
| DRB1*03:01  | 1.253  | 0.1822  | 0.8765  | 1.79   | 0.2162    |
| DRB1*04:01  | 1.103  | 0.1726  | 0.7864  | 1.547  | 0.5704    |
| DRB1*04:02  | 1.204  | 0.3209  | 0.642   | 2.259  | 0.5626    |
| DRB1*04:03  | 1.566  | 0.5152  | 0.5706  | 4.299  | 0.3838    |
| DRB1*04:04  | 0.828  | 0.1965  | 0.5634  | 1.217  | 0.3368    |
| DRB1*04:05  | 0.999  | 0.5155  | 0.3637  | 2.744  | 0.9984    |
| DRB1*04:06  | 1.4    | 1.207   | 0.1314  | 14.91  | 0.7805    |
| DRB1*04:08  | 0.8462 | 0.6015  | 0.2603  | 2.751  | 0.7813    |
| DRB1*08:03  | 0.6663 | 1.193   | 0.06436 | 6.899  | 0.7335    |
| DRB1*08:04  | 1.757  | 0.7876  | 0.3753  | 8.227  | 0.4741    |
| DRB1*09:01  | 0.7024 | 0.398   | 0.322   | 1.532  | 0.3747    |
| DRB1*10:01  | 0.277  | 0.831   | 0.05433 | 1.412  | 0.1223    |
| DRB1*11:02  | 0.5362 | 0.7817  | 0.1159  | 2.482  | 0.4253    |
| DRB1*11:03  | 2.643  | 0.6666  | 0.7155  | 9.762  | 0.1449    |
| DRB1*12:01  | 1.254  | 0.2921  | 0.7075  | 2.223  | 0.4382    |
| DRB1*13:02  | 0.6482 | 0.6136  | 0.1947  | 2.158  | 0.4798    |
| DRB1*13:03  | 0.925  | 0.3034  | 0.5104  | 1.677  | 0.7973    |
| DRB1*14:01  | 0.8403 | 0.2179  | 0.5483  | 1.288  | 0.4246    |
| DRB1*16:02  | 1.521  | 0.9991  | 0.2146  | 10.78  | 0.6749    |

conditioning for all significant HLA-DRB1, HLA-DQA1, HLA-DQB1, HLA-DPA1 and HLA-DPB1 loci. HLA-DQB1\*06:02 homozygous individuals are removed from analysis.



Table S16. Association of HLA alleles with narcolepsy in the Chinese sample after conditioning for all significant HLA-DRB1, HLA-DQA1, HLA-DQB1, HLA-DPA1 and HLA-DPB1 loci and SNPs associating with before vs. after 2009

| Allele  | OR     | SE     | Ci lower | Ci upper | P        |
|---------|--------|--------|----------|----------|----------|
| A-01:01 | 1.014  | 0.2325 | 0.6426   | 1.599    | 0.9537   |
| A-02:01 | 0.7387 | 0.123  | 0.5805   | 0.9402   | 0.01384  |
| A-02:03 | 4.919  | 1.107  | 0.5622   | 43.04    | 0.15     |
| A-02:05 | 0.5512 | 0.7673 | 0.1225   | 2.48     | 0.4375   |
| A-02:06 | 1.093  | 0.1597 | 0.7996   | 1.495    | 0.576    |
| A-02:07 | 1.558  | 0.2263 | 0.9999   | 2.427    | 0.05006  |
| A-03:01 | 0.871  | 0.213  | 0.5737   | 1.322    | 0.5167   |
| A-03:02 | 0.2324 | 0.8894 | 0.04067  | 1.328    | 0.1009   |
| A-11:01 | 1.378  | 0.1271 | 1.074    | 1.768    | 0.01166  |
| A-11:02 | 0.7744 | 0.7927 | 0.1638   | 3.662    | 0.7471   |
| A-23:01 | 0.6146 | 1.145  | 0.06512  | 5.8      | 0.6708   |
| A-24:02 | 1.037  | 0.1153 | 0.8276   | 1.3      | 0.7502   |
| A-24:03 | 0.3746 | 1.042  | 0.04858  | 2.888    | 0.346    |
| A-26:01 | 0.7988 | 0.2577 | 0.482    | 1.324    | 0.3833   |
| A-29:01 | 1.131  | 0.5183 | 0.4094   | 3.123    | 0.8126   |
| A-30:01 | 0.9645 | 0.231  | 0.6132   | 1.517    | 0.8756   |
| A-30:02 | 0.1442 | 1.629  | 0.005917 | 3.514    | 0.2346   |
| A-30:04 | 10.6   | 3.376  | 0.01419  | 7921     | 0.4843   |
| A-31:01 | 0.856  | 0.2237 | 0.5522   | 1.327    | 0.4869   |
| A-32:01 | 0.9367 | 0.4376 | 0.3973   | 2.209    | 0.8812   |
| A-33:01 | 1.562  | 1.145  | 0.1658   | 14.72    | 0.6967   |
| A-33:03 | 0.9294 | 0.2376 | 0.5834   | 1.481    | 0.7581   |
| A-34:01 | 0.1272 | 1.551  | 0.006078 | 2.661    | 0.1838   |
| A-68:01 | 0.8345 | 0.4377 | 0.3539   | 1.968    | 0.6792   |
| B-07:02 | 1.033  | 0.2039 | 0.6929   | 1.541    | 0.8723   |
| B-07:05 | 3.538  | 0.8085 | 0.7254   | 17.26    | 0.1181   |
| B-08:01 | 0.7337 | 0.5147 | 0.2676   | 2.012    | 0.5474   |
| B-13:01 | 0.7044 | 0.2559 | 0.4265   | 1.163    | 0.1708   |
| B-13:02 | 1.11   | 0.2517 | 0.6775   | 1.817    | 0.6796   |
| B-14:02 | 2.28   | 1.093  | 0.2678   | 19.41    | 0.4507   |
| B-15:01 | 1.043  | 0.1637 | 0.7564   | 1.437    | 0.7992   |
| B-15:02 | 1.309  | 0.3671 | 0.6373   | 2.687    | 0.4637   |
| B-15:07 | 0.6043 | 1.242  | 0.053    | 6.89     | 0.685    |
| B-15:11 | 1.008  | 0.301  | 0.559    | 1.819    | 0.9779   |
| B-15:17 | 23.87  | 2.261  | 0.284    | 2007     | 0.1606   |
| B-15:18 | 0.9795 | 0.2757 | 0.5706   | 1.681    | 0.9402   |
| B-15:25 | 3.087  | 2.12   | 0.04845  | 196.6    | 0.5949   |
| B-15:35 | 1.895  | 1.068  | 0.2336   | 15.37    | 0.5495   |
| B-18:01 | 0.646  | 0.4784 | 0.253    | 1.65     | 0.361    |
| B-27:04 | 0.8864 | 0.6138 | 0.2662   | 2.952    | 0.8443   |
| B-27:05 | 0.4739 | 0.5456 | 0.1626   | 1.381    | 0.1711   |
| B-35:01 | 0.8336 | 0.1852 | 0.5799   | 1.198    | 0.3258   |
| B-35:02 | 0.537  | 0.9412 | 0.08488  | 3.397    | 0.5089   |
| B-35:03 | 1.885  | 0.5596 | 0.6294   | 5.644    | 0.2574   |
| B-35:05 | 2.543  | 3.053  | 0.006405 | 1010     | 0.7598   |
| B-35:08 | 5.223  | 3.726  | 0.00352  | 7751     | 0.6573   |
| B-37:01 | 1.066  | 0.3747 | 0.5116   | 2.222    | 0.864    |
| B-38:01 | 0.6804 | 0.4763 | 0.2675   | 1.731    | 0.4189   |
| B-38:02 | 0.7919 | 0.3531 | 0.3964   | 1.582    | 0.5089   |
| B-39:01 | 0.5171 | 0.4175 | 0.2282   | 1.172    | 0.1142   |
| B-40:01 | 1.053  | 0.1698 | 0.7546   | 1.468    | 0.7627   |
| B-40:02 | 0.6124 | 0.2722 | 0.3592   | 1.044    | 0.07156  |
| B-40:06 | 1.379  | 0.2113 | 0.9115   | 2.087    | 0.1281   |
| B-41:01 | 0.3769 | 1.008  | 0.05222  | 2.72     | 0.3332   |
| B-44:02 | 0.7318 | 0.482  | 0.2845   | 1.882    | 0.5172   |
| B-44:03 | 0.8624 | 0.3639 | 0.4227   | 1.76     | 0.6842   |
| B-45:01 | 11.88  | 4.355  | 0.002333 | 6.05E+04 | 0.5699   |
| B-46:01 | 0.9556 | 0.1961 | 0.6507   | 1.403    | 0.8167   |
| B-48:01 | 0.9399 | 0.2723 | 0.5512   | 1.603    | 0.8198   |
| B-49:01 | 1.257  | 0.9696 | 0.1879   | 8.407    | 0.8136   |
| B-50:01 | 1.883  | 0.5479 | 0.6435   | 5.513    | 0.2479   |
| B-51:01 | 1.412  | 0.1938 | 0.9661   | 2.065    | 0.07477  |
| B-51:02 | 1.09   | 0.4147 | 0.4834   | 2.456    | 0.8361   |
| B-52:01 | 1.518  | 0.351  | 0.7627   | 3.02     | 0.2347   |
| B-54:01 | 1.198  | 0.2542 | 0.7278   | 1.971    | 0.4779   |
| B-55:02 | 1.308  | 0.4491 | 0.5426   | 3.155    | 0.5494   |
| B-56:01 | 1.014  | 1.239  | 0.08951  | 11.49    | 0.9909   |
| B-57:01 | 0.5252 | 0.5054 | 0.1951   | 1.414    | 0.2026   |
| B-58:01 | 0.9986 | 0.3107 | 0.5431   | 1.836    | 0.9965   |
| B-67:01 | 0.3749 | 0.3386 | 0.1931   | 0.7279   | 0.003755 |
| B-81:01 | 2.499  | 0.7842 | 0.5373   | 11.62    | 0.2429   |
| C-01:02 | 1.044  | 0.1514 | 0.7759   | 1.405    | 0.7763   |
| C-02:02 | 0.7586 | 0.5762 | 0.2452   | 2.347    | 0.6315   |
| C-03:02 | 0.9984 | 0.3107 | 0.5431   | 1.836    | 0.9959   |
| C-03:03 | 0.9598 | 0.1371 | 0.7337   | 1.256    | 0.7645   |

Table S16. continued

|             |        |        |          |        |          |
|-------------|--------|--------|----------|--------|----------|
| C-03:04     | 0.7474 | 0.1599 | 0.5464   | 1.022  | 0.06853  |
| C-04:01     | 0.9204 | 0.2065 | 0.614    | 1.38   | 0.6879   |
| C-04:03     | 0.8573 | 0.7659 | 0.1911   | 3.847  | 0.8407   |
| C-05:01     | 0.7427 | 0.4265 | 0.3219   | 1.713  | 0.4855   |
| C-06:02     | 0.9893 | 0.1853 | 0.6881   | 1.422  | 0.9537   |
| C-07:01     | 2.81   | 0.5399 | 0.9754   | 8.097  | 0.05565  |
| C-07:02     | 0.903  | 0.1303 | 0.6995   | 1.166  | 0.4333   |
| C-07:04     | 0.8002 | 0.4149 | 0.3549   | 1.805  | 0.5912   |
| C-08:01     | 1.207  | 0.1416 | 0.9146   | 1.593  | 0.1838   |
| C-08:02     | 2.257  | 1.084  | 0.2695   | 18.9   | 0.4528   |
| C-08:03     | 22.72  | 2.735  | 0.1068   | 4833   | 0.2534   |
| C-12:02     | 1.018  | 0.3398 | 0.5228   | 1.981  | 0.959    |
| C-12:03     | 0.553  | 0.3436 | 0.282    | 1.084  | 0.08463  |
| C-14:02     | 1.381  | 0.2149 | 0.9063   | 2.104  | 0.1331   |
| C-14:03     | 0.516  | 0.5598 | 0.1723   | 1.546  | 0.2372   |
| C-15:02     | 1.278  | 0.2172 | 0.835    | 1.957  | 0.2586   |
| C-15:05     | 2.788  | 0.8654 | 0.5113   | 15.2   | 0.2361   |
| C-16:02     | 7.635  | 2.408  | 0.06806  | 856.4  | 0.3986   |
| C-17:01     | 0.4004 | 1.425  | 0.02454  | 6.532  | 0.5205   |
| DPA1-02:01  | 0.1716 | 2.83   | 0.000669 | 44.01  | 0.5334   |
| DPA1-04:01  | 5.828  | 2.829  | 0.02276  | 1492   | 0.5333   |
| DPB1-01:01  | 5.512  | 1.733  | 0.1846   | 164.6  | 0.3247   |
| DPB1-02:02  | 1.016  | 0.2837 | 0.5825   | 1.771  | 0.9562   |
| DPB1-03:01  | 0.9317 | 0.2442 | 0.5773   | 1.504  | 0.772    |
| DPB1-04:01  | 1.047  | 0.1967 | 0.7121   | 1.54   | 0.8147   |
| DPB1-09:01  | 1.035  | 0.5263 | 0.3691   | 2.905  | 0.9472   |
| DPB1-09:02  | 1.199  | 0.4529 | 0.4936   | 2.913  | 0.6883   |
| DPB1-104:01 | 3.007  | 0.9011 | 0.5141   | 17.58  | 0.2218   |
| DPB1-13:01  | 1.023  | 0.3454 | 0.5198   | 2.013  | 0.9478   |
| DPB1-14:01  | 0.786  | 0.3403 | 0.4034   | 1.531  | 0.4792   |
| DPB1-17:01  | 1.154  | 0.3622 | 0.5673   | 2.347  | 0.6928   |
| DPB1-19:01  | 0.4414 | 0.6488 | 0.1238   | 1.574  | 0.2075   |
| DPB1-26:01  | 1.246  | 1.25   | 0.1075   | 14.45  | 0.8603   |
| DQA1-01:04  | 2.559  | 0.4913 | 0.9769   | 6.703  | 0.05583  |
| DQA1-01:05  | 0.9881 | 0.5878 | 0.3122   | 3.127  | 0.9837   |
| DQA1-02:01  | 1.507  | 0.2564 | 0.9116   | 2.49   | 0.1098   |
| DQA1-03:01  | 3.592  | 1.86   | 0.09377  | 137.6  | 0.4918   |
| DQA1-03:02  | 0.5429 | 0.2354 | 0.3422   | 0.8611 | 0.009457 |
| DQA1-03:03  | 1.053  | 0.2854 | 0.6019   | 1.842  | 0.8563   |
| DQA1-04:01  | 0.8242 | 0.6276 | 0.2409   | 2.82   | 0.758    |
| DQA1-05:01  | 1.021  | 0.5719 | 0.3327   | 3.131  | 0.9715   |
| DQA1-05:08  | 1.022  | 0.7604 | 0.2304   | 4.538  | 0.9767   |
| DQB1-02:01  | 1.255  | 0.6842 | 0.3282   | 4.796  | 0.7402   |
| DQB1-02:02  | 1.719  | 0.2685 | 1.016    | 2.91   | 0.04356  |
| DQB1-03:03  | 0.5218 | 0.2337 | 0.33     | 0.825  | 0.005388 |
| DQB1-04:01  | 1.14   | 0.3211 | 0.6075   | 2.139  | 0.6835   |
| DQB1-04:02  | 0.6949 | 0.5718 | 0.2266   | 2.131  | 0.5244   |
| DQB1-05:01  | 1.258  | 0.5467 | 0.4307   | 3.672  | 0.675    |
| DQB1-05:03  | 1.788  | 0.5138 | 0.6531   | 4.894  | 0.2582   |
| DQB1-06:01  | 0.4241 | 0.7346 | 0.1005   | 1.79   | 0.2429   |
| DQB1-06:04  | 1.3    | 0.6191 | 0.3864   | 4.376  | 0.6715   |
| DQB1-06:09  | 1.711  | 0.6214 | 0.5062   | 5.785  | 0.3873   |
| DRB1-01:01  | 0.4483 | 0.8979 | 0.07713  | 2.605  | 0.3716   |
| DRB1-01:02  | 13.06  | 1.852  | 0.3463   | 492.6  | 0.1653   |
| DRB1-03:01  | 0.9056 | 0.6704 | 0.2434   | 3.37   | 0.8824   |
| DRB1-04:01  | 1.251  | 0.7288 | 0.2999   | 5.219  | 0.7587   |
| DRB1-04:02  | 0.4346 | 1.447  | 0.02549  | 7.41   | 0.5647   |
| DRB1-04:03  | 2.611  | 0.5491 | 0.8901   | 7.661  | 0.08048  |
| DRB1-04:05  | 1.062  | 0.3147 | 0.5731   | 1.968  | 0.8484   |
| DRB1-04:06  | 0.5956 | 0.5574 | 0.1998   | 1.776  | 0.3525   |
| DRB1-04:10  | 0.5448 | 1.446  | 0.03201  | 9.273  | 0.6745   |
| DRB1-07:01  | 1.499  | 0.2564 | 0.9069   | 2.477  | 0.1144   |
| DRB1-08:02  | 0.6515 | 0.5847 | 0.2071   | 2.049  | 0.4636   |
| DRB1-09:01  | 0.568  | 0.2346 | 0.3586   | 0.8997 | 0.01593  |
| DRB1-10:01  | 1.033  | 0.5616 | 0.3436   | 3.105  | 0.954    |
| DRB1-11:01  | 0.7438 | 0.3586 | 0.3683   | 1.502  | 0.4092   |
| DRB1-11:04  | 0.4709 | 0.7554 | 0.1071   | 2.07   | 0.3187   |
| DRB1-12:01  | 0.9315 | 0.345  | 0.4737   | 1.832  | 0.837    |
| DRB1-13:02  | 4.064  | 1.229  | 0.3657   | 45.17  | 0.2538   |
| DRB1-13:12  | 4.451  | 1.776  | 0.137    | 144.6  | 0.4006   |
| DRB1-14:01  | 1.096  | 0.5688 | 0.3593   | 3.341  | 0.8723   |
| DRB1-14:04  | 2.863  | 0.6748 | 0.7628   | 10.75  | 0.1191   |
| DRB1-14:05  | 1.812  | 0.6194 | 0.5383   | 6.102  | 0.337    |
| DRB1-14:54  | 0.4508 | 0.9986 | 0.06367  | 3.191  | 0.4249   |
| DRB1-15:02  | 7.583  | 0.9131 | 1.266    | 45.4   | 0.02651  |
| DRB1-16:02  | 0.7475 | 0.6789 | 0.1976   | 2.828  | 0.6682   |

Association of HLA alleles with narcolepsy in the Chinese sample after conditioning for all significant HLA-DRB1, HLA-DQA1, HLA-DQB1, HLA-DPA1 and HLA-DPB1 loci and SNPs associating with before vs. after 2009. HLA-DQB1\*06:02 homozygous individuals are removed from analysis.
